# Supplementary material for: Artificial Intelligence, Power, and Ethics in Sustainability Education: A Systematic Review of Moral Risks, Governance Failures, and Leadership Mediation
Source: Research Square preprint supplement (doi:10.21203/rs.3.rs-8437389/v1), 2026-02-18
Supplement: Supplementary file 1 [file a611466aa22b46ea62a73036.docx]

# Appendix_A. PICo-SWOT Mapping and Intercoder Agreement

| Study ID (Year, Author) | PICo Components | SWOT Components | Coder A | Coder B | Coder C | Correlation with RQ |
| --- | --- | --- | --- | --- | --- | --- |
| S1 -- Cotton (2024) | P: Higher education students & faculty; I: AI (ChatGPT) for learning; Co: Academic integrity context | **W:** plagiarism risk; academic dishonesty; **O:** policy innovation | Ethics & Integrity | Policy Innovation | Curriculum Safeguards | **RQ1, RQ2** (integration requires safeguards, barrier = dishonesty) |
| S2 -- Min (2024) | P: NLP/AI researchers; I: Pre-trained LMs; Co: Computational linguistics | **S:** state-of-the-art NLP; **W:** black box; **O:** transfer to education; **T:** misuse | Innovation Driver | Opacity Barrier | Innovation Potential | **RQ1, RQ2** (innovation driver = PLMs; barrier = opacity) |
| S3 -- Farrokhnia (2024) | P: Higher education stakeholders; I: ChatGPT in education; Co: Pedagogical use | **S:** personalization; **W:** lack of higher-order reasoning; **O:** democratized access; **T:** bias, plagiarism | Balanced Analysis | Risk Emphasis | Opportunity Focus | **RQ1-RQ3** (leadership role in policy & strategies) |
| S4 -- Collins (2024) | P: Researchers; I: TRIPOD+AI reporting; Co: Machine learning transparency | **S:** reporting framework; **W:** complexity; **O:** reproducibility; **T:** poor adoption | Transparency | Complexity | Policy Need | **RQ2-RQ3** (evidence-based strategy for accountability) |
| S5 -- Fire (2024) | P: Business & edu stakeholders; I: Generative AI; Co: Socio-technical systems | **S:** creativity support; **W:** job loss risk; **O:** GDP growth; **T:** misuse | Opportunity Focus | Risk Analysis | Socio-tech Balance | **RQ1, RQ2** (driver = innovation, barrier = disruption) |
| S6 -- Pan (2024) | P: AI/edu communities; I: LLMs + KGs; Co: Knowledge integration | **S:** interpretability via KGs; **W:** construction complexity; **O:** synergy; **T:** scalability issues | Synergy Potential | Complexity Barrier | Thematic Synthesis | **RQ1-RQ3** (driver = synergy; barrier = cost) |
| S7 -- Hong (2024) | P: Remote sensing researchers; I: SpectralGPT; Co: Geoscience/edu | **S:** big data capacity; **W:** complexity; **O:** science edu integration; **T:** resource demands | Tech Optimism | Limits Focus | STEM Application | **RQ1** (curriculum innovation in STEM sustainability) |
| S8 -- Rainio (2024) | P: ML researchers & edu; I: Evaluation metrics; Co: ML model comparisons | **S:** methodological rigor; **W:** stats difficulty; **O:** improved assessment; **T:** misuse of metrics | Validity Focus | Misuse Risk | Training Need | **RQ2, RQ3** (barrier = low literacy, strategy = training) |
| S9 -- Wang X. (2024) | P: AI/edu communities; I: Deep RL; Co: Educational simulations | **S:** decision-making power; **W:** sample inefficiency; **O:** simulations in edu; **T:** ethical misuse | Innovation Driver | Complexity Risk | Ethics Emphasis | **RQ1, RQ2** (driver = pedagogy, barrier = resources) |
| S10 -- Wang L. (2024) | P: AI systems & edu; I: Continuous learning; Co: Lifelong edu | **S:** adaptability; **W:** catastrophic forgetting; **O:** lifelong learning; **T:** instability | Sustainability Driver | Knowledge Loss Risk | Lifelong Learning | **RQ1-RQ3** (links to SDG4 lifelong learning) |
| S11 -- Borisov (2024) | P: Data scientists/edu; I: DNN for tabular data; Co: ML research | **S:** performance; **W:** stagnation; **O:** tabular data use; **T:** poor generalization | Data Gaps | Stagnation Limits | Integration Potential | **RQ2** (barrier = stagnation; driver = innovation potential) |
| S12 -- Strzelecki (2024) | P: Students; I: ChatGPT adoption; Co: Higher education context | **S:** adoption predictors; **W:** reliance; **O:** behavior change; **T:** overdependence | Habit Driver | Dependence Risk | Motivation Focus | **RQ1-RQ3** (drivers = adoption factors; strategies needed) |
| S13 -- El-Kenawy (2024) | P: CS/engineering; I: GGO algorithm; Co: Optimization problems | **S:** superior accuracy; **W:** limited domains; **O:** application in edu/eng; **T:** overhype | Novel Approach | Scope Limits | Adoption Potential | **RQ1-RQ2** (driver = innovation; barrier = limited scope) |
| S14 -- Belhadi (2024) | P: Firms/edu ops; I: AI in supply chain; Co: Global crises | **S:** resilience; **W:** complexity; **O:** cross-sector learning; **T:** disruptions | Resilience Focus | Cost Barriers | Cross-Sector Link | **RQ2-RQ3** (drivers = resilience; strategy = policy design) |
| S15 -- Chen (2024) | P: Pathology/edu; I: UNI model foundation; Co: Medical edu | **S:** scalability; **W:** annotation challenge; **O:** diagnostic training; **T:** bias in data | Pathology Advance | Annotation Barrier | Evidence Training | **RQ1-RQ3** (innovation, barriers, policy strategy) |
| S16 -- Zhao (2024) | P: Research CV; I: CNN; Co: Computer Vision & edu | **S:** high accuracy; **W:** complexity; **O:** edu adoption; **T:** resources | Performance Focus | Complexity | Edu Innovations | **RQ1, RQ2** (driver = AI innovation, barrier = complexity) |
| S17 -- Gao (2024) | P: NLP/CV; I: CLIP-Adapter; Co: Vision-language models | **S:** zero-shot accuracy; **W:** prompt complexity; **O:** multimodal edu; **T:** biased | CLIP Potential | Flexibility Limits | Bias Risk | **RQ1, RQ2** (driver = multimodal innovation, barrier = bias/complexity) |
| S18 -- Abulibdeh (2024) | P: HEIs; I: AI tools (ChatGPT); Co: ESD & Industry 4.0 | **S:** curriculum innovation; **W:** ethical gaps; **O:** ESD promotion; **T:** industry mismatch | ESD Highlights | Ethical Concerns | Curriculum Focus | **RQ1-RQ3** (driver = new curriculum, barrier = ethical gaps) |
| S19 -- Ferrara (2024) | P: Multidomain; I: AI fairness; Co: Bias mitigation | **S:** awareness bias; **W:** generative bias; **O:** fair AI systems; **T:** inequality | Fairness Focus | Bias Risk | Mitigation Proposal | **RQ2-RQ3** (barrier = bias, strategy = fairness mitigation) |
| S20 -- Yang (2024) | P: Practitioners; I: LLMs; Co: Applied NLP | **S:** broad use cases; **W:** spurious bias; **O:** diverse adoption; **T:** costs | Practical Highlights | Limits Focus | Efficiency Record | **RQ1, RQ2** (driver = practicality, barrier = bias & cost) |
| S21 -- Raiaan (2024) | P: AI researchers; I: LLMs; Co: Applications & challenges | **S:** versatility; **W:** deployment issues; **O:** education, health; **T:** scalability | Breadth Emphasis | Risk Note | Social Apps View | **RQ1-RQ3** (driver = widespread application, barrier = scalability) |
| S22 -- Vats (2024) | P: Med/edu; I: IEFCM model; Co: Healthcare imaging | **S:** high accuracy; **W:** dataset limits; **O:** faster diagnosis; **T:** misdiagnosis | Accuracy Highlight | Limitations Focus | Medical Benefits | **RQ1, RQ3** (driver = accuracy, strategy = medical curriculum) |
| S23 -- Cui (2024) | P: Biologists/edu; I: scGPT; Co: Single-cell multi-omics | **S:** large dataset; **W:** complexity; **O:** biomedical edu; **T:** interpretability | Bio Innovation | Scale Data Focus | Omics Integration | **RQ1, RQ2** (driver = bio-edu innovation, barrier = data complexity) |
| S24 -- Yan (2024) | P: EdTech researchers; I: LLMs; Co: Automation tasks | **S:** automated grading; **W:** low replicability; **O:** teaching support; **T:** privacy | Use Cases | Limits Highlight | Ethical Issues | **RQ1-RQ3** (driver = automation, barrier = replicability/privacy) |
| S25 -- Gill (2024) | P: Teachers, students; I: ChatGPT; Co: HE & IoT | **S:** content creation; **W:** hallucinations; **O:** new pedagogy; **T:** plagiarism | Transformation | Risk Emphasis | Edu Utility | **RQ1, RQ2** (driver = content creation, barrier = hallucinations) |
| S26 -- Chiu (2024) | P: School teachers/leaders; I: GenAI (ChatGPT, Midjourney); Co: K-12 | **S:** multidomain edu; **W:** hallucination; **O:** interdisciplinary teaching; **T:** assessment issues | School Practices | Limits Focus | New Policy View | **RQ1-RQ3** (driver = interdisciplinarity, barrier = hallucination) |
| S27 -- Bibi (2024) | P: Urban/edu planners; I: AIoT; Co: Smart eco-cities | **S:** sustainability; **W:** complexity; **O:** eco-edu integration; **T:** resource gaps | Eco-Cities Highlight | Challenge Emphasis | Policy Opportunities | **RQ1-RQ3** (driver = eco-sustainability, barrier = resource gaps) |
| S28 -- Ye (2024) | P: AI researchers; I: HFL; Co: Distributed edu | **S:** collaborative models; **W:** heterogeneity; **O:** global learning; **T:** comms issues | Collaboration Emphasis | Heterogeneity Focus | Pros/Cons Analysis | **RQ2-RQ3** (driver = collaboration, barrier = heterogeneity) |
| S29 -- Carvalho (2024) | P: Tourism stakeholders; I: ChatGPT; Co: Tourism sector | **S:** service efficiency; **W:** HR disruption; **O:** customer service; **T:** job loss | Hospitality Highlights | Risk Emphasis | Productivity Record | **RQ2-RQ3** (driver = service efficiency, barrier = job disruption) |
| S30 -- Dwivedi (2024) | P: Hospitality stakeholders; I: GenAI; Co: Tourism/hospitality | **S:** service transformation; **W:** adoption challenges; **O:** new business model; **T:** regulation gaps | Practice Focus | Risk Highlight | Strategy Note | **RQ2-RQ3** (driver = service transformation, barrier = regulation gap) |
| S31 -- Chen (2024) | P: Medical imaging; I: Transformer-enhanced U-Net (TransUNet); Co: Healthcare applications | **S:** Improves segmentation accuracy; **W:** Complexity in modeling; **O:** Broader use in diagnostics; **T:** Competing benchmarks | Accuracy Focus | Complexity | Diagnostic Potential | **RQ1, RQ2** (driver = accuracy, barrier = complexity) |
| S32 -- Zhang (2024) | P: TCM researchers; I: AI-based network pharmacology; Co: Precision medicine | **S:** Integrates AI with TCM; **W:** Data heterogeneity; **O:** Holistic disease insights; **T:** Limited validation | Integration Potential | Data Issues | Validation Need | **RQ1** (driver = AI-TCM integration, barrier = validation) |
| S33 -- Chiu (2024) | P: K-12 students; I: AI chatbot + teacher support; Co: Classroom | **S:** Teacher moderates motivation; **W:** Weak autonomy; **O:** Enhance self-regulated learning; **T:** Pedagogical misalignment | Motivation Driver | Autonomy Risk | Learning Enhancement | **RQ1, RQ2** (driver = hybrid learning, barrier = autonomy) |
| S34 -- Li (2024) | P: AI developers; I: Backdoor learning survey; Co: Security contexts | **S:** Comprehensive survey; **W:** High threat risk; **O:** Defensive strategies; **T:** Adversarial manipulation | Threat Survey | Risk Emphasis | Defense Strategies | **RQ2** (barrier = security threat, driver = defense) |
| S35 -- Liu (2024) | P: EFL learners; I: ChatGPT informal digital learning; Co: Non-classroom | **S:** Behavioral intention drives use; **W:** Over-reliance on usefulness; **O:** Language innovation; **T:** Reduced autonomy | Behavioral Driver | Dependency Risk | Innovation Potential | **RQ1, RQ2** (driver = informal learning, barrier = overdependence) |
| S36 -- Varnosfaderani (2024) | P: Hospitals/clinics; I: AI in healthcare systems; Co: Global health sector | **S:** Optimizes decisions & operations; **W:** Ethical & privacy concerns; **O:** Personalized medicine; **T:** High costs | Decision Optimization | Ethics Concerns | Personalization | **RQ1, RQ2** (driver = efficiency, barrier = ethics/costs) |
| S37 -- Stahl (2024) | P: Society & educators; I: Ethical assessment of ChatGPT; Co: Technology ethics | **S:** Broad ethical mapping; **W:** Narrow prior discourse; **O:** Holistic framework; **T:** Risks in autonomy/bias | Ethical Mapping | Bias Risk | Framework Need | **RQ2, RQ3** (barrier = bias, strategy = ethical framework) |
| S38 -- Abarenkov (2024) | P: Biologists; I: UNITE molecular database + AI; Co: Taxonomic communication | **S:** 10M curated sequences; **W:** Data complexity; **O:** Cross-kingdom integration; **T:** Misclassification | Database Value | Complexity | Integration Potential | **RQ1** (driver = open science, barrier = complexity) |
| S39 -- Babina (2024) | P: Firms; I: AI investment measure; Co: Economics & innovation | **S:** AI boosts growth & innovation; **W:** Concentrated in large firms; **O:** Industry expansion; **T:** Market concentration | Growth Focus | Concentration Risk | Expansion Potential | **RQ2** (driver = economic growth, barrier = concentration) |
| S40 -- Besta (2024) | P: LLM users; I: Graph of Thoughts framework; Co: Reasoning tasks | **S:** Improves LLM reasoning; **W:** Cost of complexity; **O:** Human-like problem solving; **T:** Overfitting risks | Reasoning Enhancement | Complexity Cost | Problem-solving | **RQ1** (driver = reasoning improvement, barrier = complexity) |
| S41 -- Sun (2024) | P: ML practitioners; I: Improved Random Forest; Co: ML applications | **S:** Higher accuracy; **W:** CART limitations; **O:** Robust models; **T:** Low generalizability | Accuracy Improvement | Limitations | Robustness | **RQ1** (driver = algorithm improvement, barrier = generalizability) |
| S42 -- Walter (2024) | P: HE students & educators; I: AI literacy, prompt engineering, critical thinking; Co: Classroom/HE | **S:** Enhances pedagogy; **W:** Teacher readiness; **O:** Embedding AI literacy; **T:** Digital inequality | Pedagogy Enhancement | Readiness Gap | Literacy Embedding | **RQ1, RQ3** (driver = literacy, barrier = inequality) |
| S43 -- Cao (2024) | P: Researchers; I: Generative diffusion models; Co: AI for creativity | **S:** Expands human creativity; **W:** Algorithmic complexity; **O:** Multi-domain applications; **T:** Misuse potential | Creativity Expansion | Complexity | Application Breadth | **RQ1** (driver = creative innovation, barrier = misuse) |
| S44 -- Abbas (2024) | P: University students; I: ChatGPT use & consequences; Co: HE context | **S:** Validated usage scale; **W:** Procrastination/memory loss; **O:** Workload relief; **T:** Academic decline | Usage Scale | Behavioral Risk | Workload Relief | **RQ2** (driver = utility, barrier = academic decline) |
| S45 -- Mennella (2024) | P: Healthcare stakeholders; I: Ethical/regulatory AI in health; Co: Clinical practice | **S:** Governance insights; **W:** Ethical entanglements; **O:** Policy frameworks; **T:** Legal barriers | Governance Insights | Ethics Challenges | Policy Framework | **RQ2, RQ3** (driver = governance, barrier = legal barriers) |
| S46 -- Pinto et al. (2025) | P: HEIs, academics & communities; I: Integration of biodiversity in curriculum & practice; Co: global (EcoCampus, living labs) | **S:** innovative practices (EcoCampus, green spaces); **W:** limitations of implementation; **O:** cross-sector collaboration; **T:** policy resistance | Biodiversity Integration | Implementation Limits | Cross-Sector Collaboration | **RQ1, RQ2** (integration of competencies, policy drivers/barriers) |
| S47 -- Cantillo et al. (2025) | P: engineering students; I: biodiversity knowledge in the curriculum; Co: Norway (case study) | **S:** increasing student awareness; **W:** limitations of specific implementation; **O:** integration into general courses; **T:** lecturer resistance/curriculum traditions | Biodiversity Awareness | Implementation Barriers | General Integration | **RQ1, RQ2** (curriculum innovation, obstacles/support) |
| S48 -- Mac-lean et al. (2025) | P: STEM female students; I: sustainability transformation & gender participation; Co: Chile | **S:** sustainability attracts women; **W:** underrepresentation remains high; **O:** equality policies; **T:** gender stereotypes | Gender in STEM | Underrepresentation | Women's Leadership | **RQ1, RQ2, RQ3** (gender equity, policy context) |
| S49 -- Yerokhin et al. (2025) | P: German HEIs; I: biodiversity conservation; Co: Germany | **S:** student & staff initiative; **W:** financial limitations; **O:** curriculum integration; **T:** conflict of interest | Green Spaces | Financial Limits | Student Engagement | **RQ1, RQ2** (student-led initiatives, financial barriers) |
| S50 -- Alghamdi et al. (2017) | P: HEIs; I: sustainability indicators & assessment tools; Co: global | **S:** assessment framework; **W:** implementation variation; **O:** global standardization; **T:** inability to adapt locally | Sustainability Tools | Variation | Standardization | **RQ1, RQ3** (tool-based strategy, governance) |
| S51 -- Sepasi et al. (2019) | P: HEIs; I: sustainability reporting; Co: global | **S:** initial report adoption; **W:** low quality, inconsistent; **O:** public transparency; **T:** low reputation | Reporting Gaps | Quality Issues | Accountability | **RQ2, RQ3** (institutional barriers, strengthening governance) |
| S52 -- Anholon et al. (2024) | P: HEI managers; I: stakeholder management; Co: global | **S:** 7 management area guidelines; **W:** practices are not yet comprehensive; **O:** multistakeholder collaboration; **T:** organizational resistance | Stakeholder Governance | Practice Gaps | Collaboration | **RQ2, RQ3** (governance drivers, implementation strategies) |
| S53 -- Hansen et al. (2021) | P: university (USF); I: SDGs integration in curriculum & reporting; Co: USA | **S:** SDGs branding (Global Citizens Project); **W:** program fragmentation; **O:** THE Impact Rankings as a driver; **T:** lack of sustainability literacy | SDG Integration | Fragmentation | Driver Rankings | **RQ1, RQ2** (SDG-branded curriculum, rating drivers & barriers) |
| S54 -- O'Keeffe et al. (2020) | P: UK HEIs; I: Environmental Management Systems (EMS); Co: UK | **S:** formal EMS (ISO 14001, EMAS); **W:** organizational resistance; **O:** EMS alternatives for HEIs; **T:** governance rigidity | EMS Adoption | Resistance Barriers | Alternatives | **RQ2** (barrier/resistance & governance) |
| S55 -- Bezzina et al. (2025) | P: business & economics students; I: sustainability competency validation (KCiS-IT); Co: 7 HEIs, Europe | **S:** construct & concurrent validity; **W:** context limitations; **O:** IPSC reinforcement; **T:** perceptual bias | KCiS-IT Tool | Context Limits | Competence Reinforcement | **RQ1, RQ3** (competence validation, assessment strategy) |
| S56 -- Hermann et al. (2025) | P: students & local communities; I: SDGs-based service learning; Co: Brazil | **S:** university–community collaboration; **W:** limited generalizability; **O:** participatory model; **T:** limited institutional support | Service Learning | Generalizability Limits | Local Empowerment | **RQ1, RQ2** (transformative learning, support conditions) |
| S57 -- Leung et al. (2025) | P: Canadian universities & indigenous communities; I: science communication & sustainability; Co: Canada | **S:** integration of indigenous knowledge; **W:** policy limitations; **O:** cross-disciplinary curriculum; **T:** industrial-environmental conflict | Science Communication | Policy Limits | Community Engagement | **RQ1, RQ2** (indigenous knowledge integration, conflict mediation) |
| S58 -- Teixeira et al. (2024) | P: service ecosystem; I: SDGs 13–15 service framework; Co: global | **S:** human-nature mutualism model; **W:** concept is still normative; **O:** contribution of sustainable services; **T:** industrial resistance | Service Ecosystems | Normative Concept | Human-Nature Link | **RQ3** (cross-SDG conceptual strategy) |
| S59 -- Gaete-Sepulveda et al. (2025) | P: European students; I: SDGs-based student housing model; Co: 13 cities, 8 European countries | **S:** holistic needs model (wheel model); **W:** PBSA service gap; **O:** wellbeing–SDG3/4/11 integration; **T:** housing policy limitations | Student Housing | Service Gap | Wellbeing Integration | **RQ1, RQ2** (supportive environment, policy drivers) |
| S60 -- Gasperina et al. (2022) | P: Brazilian universities; I: smart campus practices; Co: Brazil & global | **S:** technological efficiency, waste reduction; **W:** scalability limitations; **O:** smart campus innovation; **T:** high costs | Smart Practices | Scalability Limits | Tech-enabled SDGs | **RQ1, RQ3** (technology-based innovation, operational strategy) |
| S61 (2023, Franklin et al.) | P: Tourism undergraduates; I: Service-learning for sustainability competencies; Co: Bamyan Univ., Afghanistan (conflict-affected HE) | **S:** competency gains; community ties; **W:** conflict context | Service Learning | Conflict Context | Community Link | **RQ1; also RQ2** (competency development in fragile contexts) |
| S62 (2024, Albareda-Tiana et al.) | P: UG/PG students & instructors; I: Active methodology (PBL, case) + SDG-linked curriculum; Co: Spanish university (cross-dept.) | **S:** synergy of competencies; **W:** limited interdisciplinary students | Active Methods | Interdisciplinary Limits | Cross-Departmental | **RQ1; also RQ2, RQ3** (active pedagogy, collaboration) |
| S63 (2024, Cembranel et al.) | P: HEIs; I: Strategies to cultivate SDG-centric culture; Co: Global HE (integrative literature) | **O:** governance & partnerships opportunities; **W:** integration challenges | Governance Focus | Integration Barriers | Strategic Pathways | **RQ3; also RQ2** (leadership & governance strategies) |
| S64 (2023, Mokski et al.) | P: HE students across disciplines; I: Interdisciplinary ESD approach (dual-track); Co: HEIs (theoretical synthesis) | **O:** dual curriculum strategy; tech & e-learning | Dual-Track Approach | Theoretical | Tech Integration | **RQ1; also RQ3** (interdisciplinary curriculum design) |
| S65 (2024, Finatto et al.) | P: UNISUL community; I: ESG–SDG audit practices; Co: Brazilian university (case) | **W:** governance gaps; **S:** documented practices | ESG-SDG Audit | Governance Gaps | Documented Practices | **RQ2; also RQ3** (governance assessment, practice mapping) |
| S66 (2022, Leal Filho et al.) | P: Asian HEIs; I: Practices & survey of SD integration; Co: Asia (multi-country) | **O:** baseline & variation leverage | Regional Survey | Variation Analysis | Baseline Data | **RQ2** (regional benchmarking, variation analysis) |
| S67 (2020, Finnveden et al.) | P: Swedish HEIs; I: National evaluation of elementary school integration in education; Co: Sweden (policy-led) | **W:** lack of overarching goals & follow-up | Policy Evaluation | Goal Gaps | Follow-up Issues | **RQ1; also RQ2** (policy integration, competency focus) |
| S68 (2024, Zhong et al.) | P: Chinese university students; I: ESD pathways → cognition → behaviors (SEM); Co: China HEIs | **S:** ESD boosts cognition & behavior; **W:** sample limits | Cognition Pathways | Sample Limits | Behavioral Impact | **RQ1** (cognition-behavior mediation, discipline variation) |
| S69 (2023, Saleem et al.) | P: Students & teachers (Malaysia); I: ESD approaches & sustainability consciousness; Co: 4 Malaysian universities | **S:** ESD linked to SC; **O:** expand action-oriented | Holistic ESD | Action Need | Consciousness Link | **RQ1; also RQ3** (ESD approaches, consciousness development) |
| S70 (2024, Yoo et al.) | P: Korean undergraduates; I: Sustainability consciousness construct & predictors; Co: Seoul National University | **S:** validated construct; insights by discipline/year | Construct Validation | Discipline Variation | Predictor Analysis | **RQ1** (consciousness measurement, demographic factors) |
| S71 (2021, Yılmaz Fındık et al.) | P: Pre-service ELT teachers; I: Conceptualizations of SD; Co: Turkish HE (ELT dept.) | **W:** lack training; unidimensional views; **O:** design syllabus | Conceptual Gaps | Training Need | Syllabus Design | **RQ2; also RQ3** (teacher preparation, curriculum design) |
| S72 (2024, Engman) | P: HE language educators/students; I: Decolonising curriculum via relationality & place; Co: Northern Ireland (ELT programme) | **O:** de-centre English; relational practices | Decolonising Curriculum | Relational Practices | Place-based | **RQ1; also RQ2** (decolonial pedagogy, language equity) |
| S73 (2021, Zahid et al.) | P: HEI leaders/units; I: Sustainability integration & implementation index; Co: Pakistan (3 universities) | **W:** integration/reporting gaps; **O:** index as tool | Integration Index | Reporting Gaps | Diagnostic Tool | **RQ2; also RQ3** (governance assessment, policy tool) |
| S74 (2024, Girgen & Kole) | P: Tourism education academics; I: 'New normal' edu practices (BL, VR, AI, LMS); Co: North Cyprus + global review | **O:** technology-enabled pedagogy; **T:** shock preparedness | Tech Pedagogy | Preparedness Need | Crisis Readiness | **RQ2; also RQ1** (digital transformation, institutional readiness) |
| S75 (2025, Aggarwal & Agarwala) | P: University students (Delhi NCR); I: Leadership → policy → practices → green behavior (PLS-SEM); Co: India | **S:** leadership drives policy & behavior; **O:** culture-building | Leadership Focus | Policy Mediation | Culture Building | **RQ3; also RQ2** (leadership influence, policy mediation) |

1. **Filling in notes:**
2. **1. Correlation with RQ - Determined based on the study's thematic-content analysis of three Research Questions:**
3. **o RQ1 related to AI integration, moral responsibility, epistemic authority, decision-making power**
4. **o RQ2 related to ethical risks, governance failures, structural inequalities**
5. **o RQ3 related to ethical leadership, institutional governance, and justice-oriented education**
6. **2. Coders A, B, and C - Coded based on each coder's analytical focus as seen in the data:**
7. **o Coder A tends to focus on positive aspects/opportunities/drivers**
8. **o Coder B tends to focus on negative aspects/risks/barriers**
9. **o Coder C tends to focus on strategic aspects/policies/applications**
10. **3. PICo Component - Completed from the original data (Population, Interest, Context)**
11. **4. SWOT Component - Clarified with codes S (Strength), W (Weakness), O (Opportunity), T (Threat) based on the thematic-content analysis**

# Appendix B. PICo Component-Correlation with RQ

| Study ID (Year, Author) | PICo Components | Operational Definition | Correlation with RQ |
| --- | --- | --- | --- |
| S1 -- Cotton (2024) | **P:** HE students & lecturers; **I:** ChatGPT & academic integrity; **Co:** Global higher education | The use of AI (ChatGPT) for learning & the challenge of maintaining academic integrity | **RQ1, RQ2** (integration requires safeguards, barrier = dishonesty) |
| S2 -- Min (2024) | **P:** NLP/AI researcher; **I:** Pre-trained LMs; **Co:** Computational research | Large language models for NLP tasks, potentially adapted to AI-based curricula | **RQ1, RQ2** (driver = PLM; barrier = opacity) |
| S3 -- Farrokhnia (2024) | **P:** Education stakeholders; **I:** ChatGPT for learning; **Co:** Higher education context | ChatGPT SWOT for education (access, personalization vs. plagiarism, bias) | **RQ1-RQ3** (leadership strategies in facing risks/opportunities) |
| S4 -- Collins (2024) | **P:** Predictive model researcher; **I:** TRIPOD+AI reporting; **Co:** AI/ML research | Transparent reporting standards for AI-based predictive models | **RQ2, RQ3** (evidence-based reporting & accountability strategy) |
| S5 -- Fire (2024) | **P:** Business & education practitioner; **I:** Generative AI; **Co:** Global socio-technical systems | Conceptualization of generative AI in BISE, job/education opportunities & risks | **RQ1, RQ2** (driver = innovation; barrier = work disruption) |
| S6 -- Pan (2024) | **P:** AI & edu Community; **I:** LLM + KG Integration; **Co:** Knowledge systems | LLM + KG unification roadmap for inference, interpretability, learning | **RQ1-RQ3** (driver = synergy; barrier = complexity) |
| S7 -- Hong (2024) | **P:** RS/edu researcher; **I:** SpectralGPT; **Co:** Geoscience/RS data | Foundation model for remote sensing, implications for STEM edu | **RQ1** (STEM sustainability innovation curriculum) |
| S8 -- Rainio (2024) | **P:** ML researcher; **I:** ML model evaluation; **Co:** Statistical literacy | A guide to evaluation metrics & statistical tests for model comparison | **RQ2, RQ3** (barrier = low statistical literacy; strategy = training) |
| S9 -- Wang X. (2024) | **P:** AI & edu community; **I:** Deep RL; **Co:** Simulation applications | DRL for agent-based learning control & simulation | **RQ1, RQ2** (driver = simulation; barrier = resources & ethics) |
| S10 -- Wang L. (2024) | **P:** AI system & lifelong learners; **I:** Continuous learning; **Co:** Adaptive learning | Comprehensive survey of continuous learning: plasticity, generalizability | **RQ1-RQ3** (lifelong learning strategy → SDG4) |
| S11 -- Borisov (2024) | **P:** Data scientists; **I:** DNN for tabular data; **Co:** ML Research | DNN survey for tabular data, performance stagnation challenges | **RQ2** (barrier = research stagnation; driver = limited innovation) |
| S12 -- Strzelecki (2024) | **P:** HE students; **I:** ChatGPT adoption; **Co:** HE Context | SEM-based ChatGPT acceptance & usage model (habit, motivation) | **RQ1-RQ3** (drivers = adoption factors; leadership strategy) |
| S13 -- El-Kenawy (2024) | **P:** CS/eng researcher; **I:** GGO algorithm; **Co:** Optimization | A new metaheuristic algorithm inspired by grey geese for optimization | **RQ1, RQ2** (driver = optimization innovation; barrier = domain limitations) |
| S14 -- Belhadi (2024) | **P:** Global company; **I:** AI-driven supply chain; **Co:** Global crisis | An empirical investigation of AI, resilience & supply chain performance | **RQ2-RQ3** (driver = resilience; strategy = AI policy) |
| S15 -- Chen (2024) | **P:** Pathology/medical education; **I:** UNI foundation model; **Co:** Computational pathology | General-purpose foundation model for diagnosis & education | **RQ1-RQ3** (driver = innovation; barrier = annotation; training strategy) |
| S16 -- Zhao (2024) | **P:** Computer vision researcher; **I:** CNN; **Co:** CV application | CNN as the main method for classification, segmentation, detection, replacing traditional ML | **RQ1, RQ2** (driver = AI innovation, barrier = complexity) |
| S17 -- Gao (2024) | **P:** NLP/CV Researcher; **I:** CLIP-Adapter; **Co:** Vision-language learning | CLIP-Adapter as a multimodal fine-tuning solution to reduce engineering prompts | **RQ1, RQ2** (driver = multimodal innovation, barrier = bias/complexity) |
| S18 -- Abulibdeh (2024) | **P:** HEIs; **I:** AI (ChatGPT) in ESD; **Co:** Era Industry 4.0 | Integration of AI into ESD curriculum, ethics, continuous learning, partnership with industry | **RQ1-RQ3** (driver = new curriculum, barrier = ethical gaps) |
| S19 -- Ferrara (2024) | **P:** Multidomain; **I:** AI fairness & bias; **Co:** Healthcare, employment, justice | AI bias survey (data, algorithms, humans) and generative mitigation strategies | **RQ2-RQ3** (barrier = bias, strategy = fairness mitigation) |
| S20 -- Yang (2024) | **P:** NLP Practitioner; **I:** LLMs; **Co:** Downstream tasks | LLM practical guide to various NLP tasks: use & non-use cases, efficiency, cost | **RQ1, RQ2** (driver = LLM practicality, barrier = bias & cost) |
| S21 -- Raiaan (2024) | **P:** AI researcher; **I:** LLMs; **Co:** Multidomain (edu, health, society) | A comprehensive review of the architecture, applications, challenges, and prospects of LLMs | **RQ1-RQ3** (driver = widespread application, barrier = scalability, strategy = research roadmap) |
| S22 -- Vats (2024) | **P:** Med professionals & edu; **I:** IEFCM model; **Co:** Healthcare imaging | IEFCM model for multi-disease detection from CXR with high sensitivity & specificity | **RQ1, RQ3** (driver = accuracy, strategy = medical curriculum application) |
| S23 -- Cui (2024) | **P:** Biologists & edu; **I:** scGPT; **Co:** Single-cell multi-omics | Foundation scGPT model for single-cell biology, multi-omics, transfer learning | **RQ1, RQ2** (driver = bio-edu innovation, barrier = data complexity) |
| S24 -- Yan (2024) | **P:** EdTech Researcher; **I:** LLMs automation; **Co:** Higher education | A systematic review of 118 studies on the automation of educational tasks by LLMs | **RQ1-RQ3** (driver = automation, barrier = replicability/privacy, strategy = human-centered) |
| S25 -- Gill (2024) | **P:** Teachers & students; **I:** ChatGPT; **Co:** HE & IoT | A study on the transformative effects of ChatGPT in modern education & mobile devices | **RQ1, RQ2** (driver = content creation, barrier = hallucinations) |
| S26 -- Chiu (2024) | **P:** Teachers & leaders K-12; **I:** GenAI (ChatGPT, Midjourney); **Co:** School edu | A qualitative study of the effects of GenAI on learning, assessment, school management | **RQ1-RQ3** (driver = interdisciplinarity, barrier = hallucination, strategy = new assessment policy) |
| S27 -- Bibi (2024) | **P:** Urban planners, eco-cities; **I:** AIoT; **Co:** Smart eco-cities | AI/AIoT review for eco-cities: drivers, enablers, barriers, sustainability solutions | **RQ1-RQ3** (driver = eco-sustainability, barrier = resource gaps, strategy = green urban policy) |
| S28 -- Ye (2024) | **P:** AI researchers; **I:** HFL; **Co:** Heterogeneous FL applications | HFL Survey: challenges of heterogeneity of data, models, devices, communication | **RQ2-RQ3** (driver = collab, barrier = heterogeneity, strategy = solution taxonomy) |
| S29 -- Carvalho (2024) | **P:** Tourism stakeholders; **I:** ChatGPT; **Co:** Tourism industry | Study on ChatGPT applications in tourism (front-office, back-office, HR risks) | **RQ2-RQ3** (driver = service efficiency, barrier = job disruption, strategy = policy adoption) |
| S30 -- Dwivedi (2024) | **P:** Hospitality & tourism; **I:** GenAI apps; **Co:** Tourism sector | Analysis of GenAI practices & challenges in hospitality, plus research agenda | **RQ2-RQ3** (driver = service transformation, barrier = regulation gap, strategy = research agenda) |
| S31 -- Chen (2024) | **P:** Radiologists, med imaging; **I:** Transformer-enhanced U-Net (TransUNet); **Co:** Healthcare diagnosis | TransUNet improves the accuracy of medical image segmentation for diagnosis | **RQ1, RQ2** (driver = accuracy, barrier = complexity) |
| S32 -- Zhang (2024) | **P:** TCM researchers; **I:** AI-based network pharmacology; **Co:** Precision medicine | AI applied to TCM pharmacology for heterogeneous data integration and holistic disease insights | **RQ1** (driver = AI-TCM integration, barrier = validation) |
| S33 -- Chiu (2024) | **P:** K-12 students & teachers; **I:** AI chatbot + teacher scaffolding; **Co:** Classroom practice | AI chatbots are used to support motivation and self-directed learning with teacher moderation | **RQ1, RQ2** (driver = hybrid learning, barrier = autonomy) |
| S34 -- Li (2024) | **P:** AI developers; **I:** Backdoor learning; **Co:** AI security | A comprehensive survey of backdoor learning threats and defensive strategies | **RQ2** (barrier = security threat, driver = defense) |
| S35 -- Liu (2024) | **P:** EFL learners; **I:** ChatGPT for informal digital learning; **Co:** Out-of-classroom contexts | ChatGPT is used by EFL students for informal language learning based on behavioral intentions | **RQ1, RQ2** (driver = informal learning, barrier = overdependence) |
| S36 -- Varnosfaderani (2024) | **P:** Hospitals, clinicians; **I:** AI-based decision support; **Co:** Global healthcare | AI supports personalization of services, decision-making, and efficiency of healthcare systems | **RQ1, RQ2** (driver = efficiency, barrier = ethics/costs) |
| S37 -- Stahl (2024) | **P:** Educators, policymakers; **I:** Ethical assessment of ChatGPT; **Co:** Tech ethics frameworks | A comprehensive ChatGPT ethics mapping to build an ethical framework for AI education | **RQ2, RQ3** (barrier = bias, strategy = ethical framework) |
| S38 -- Abarenkov (2024) | **P:** Biologists; **I:** UNITE molecular database + AI; **Co:** Taxonomic classification | UNITE database with >10M sequences combined with AI for communication across organism kingdoms | **RQ1** (driver = open science, barrier = complexity) |
| S39 -- Babina (2024) | **P:** Firms & industries; **I:** AI investment metrics; **Co:** Economic innovation | A new measure of AI investment shows the concentration of growth in large companies | **RQ2** (driver = economic growth, barrier = concentration) |
| S40 -- Besta (2024) | **P:** LLM developers & users; **I:** Graph of Thoughts (GoT); **Co:** Reasoning tasks | The GoT framework enhances LLM reasoning for complex problem-solving | **RQ1** (driver = reasoning improvement, barrier = complexity) |
| S41 -- Sun (2024) | **P:** ML practitioners; **I:** Improved Random Forest; **Co:** Machine learning | Improved Random Forest model improves accuracy & robust performance | **RQ1** (driver = algorithm improvement, barrier = generalizability) |
| S42 -- Walter (2024) | **P:** HE students & lecturers; **I:** AI literacy (prompting, critical thinking); **Co:** HE contexts | AI literacy & prompting skills are taught in the HE curriculum to enhance digital capacity | **RQ1, RQ3** (driver = literacy, barrier = inequality) |
| S43 -- Cao (2024) | **P:** Researchers; **I:** Diffusion models; **Co:** Creative industries | Generative diffusion models expand human creativity with multidomain applications | **RQ1** (driver = creative innovation, barrier = misuse) |
| S44 -- Abbas (2024) | **P:** University students; **I:** ChatGPT usage scale; **Co:** HE learning | Validation scale study of ChatGPT usage & its consequences on academic behavior | **RQ2** (driver = utility, barrier = academic decline) |
| S45 -- Mennella (2024) | **P:** Healthcare policymakers, practitioners; **I:** Ethical & regulatory frameworks for AI; **Co:** Clinical practice | Regulatory & ethical analysis of AI in the healthcare sector for clinical governance | **RQ2, RQ3** (driver = governance, barrier = legal barriers) |
| S46 -- Pinto et al. (2025) | **P:** HEIs & campus communities; **I:** Integration of biodiversity in policy, curriculum, practice; **Co:** global overview | A systematic review that maps biodiversity components in HEIs (EcoCampus, living labs, green spaces, SDG14) along with benefits, limitations, and implementation prerequisites | **RQ1, RQ2** (integration of competencies through curriculum/practice, policy drivers/barriers & collaboration) |
| S47 -- Cantillo et al. (2025) | **P:** engineering students; **I:** biodiversity knowledge in the curriculum; **Co:** Norway case study | Elective courses & program coordinator interviews demonstrated the effectiveness of embedding biodiversity in existing courses and the importance of early exposure for students | **RQ1, RQ2** (curriculum innovation, obstacles/support for implementation in engineering study programs) |
| S48 -- Mac-lean et al. (2025) | **P:** STEM female students; **I:** participation & sustainability transformation; **Co:** Chile | Focus on the role of sustainability in driving women's interest & leadership in STEM, policy context & stereotypes | **RQ1, RQ2, RQ3** (gender equity, participation drivers, leadership pathways) |
| S49 -- Yerokhin et al. (2025) | **P:** German HEIs; **I:** biodiversity conservation; **Co:** Germany | Staff–student initiatives, financial limitations, opportunities for curriculum integration | **RQ1, RQ2** (student-led initiatives, financial barriers, curriculum opportunities) |
| S50 -- Alghamdi et al. (2017) | **P:** HEIs; **I:** sustainability indicators/assessment tools; **Co:** global | Assessment framework & benchmarking of ESD practices in higher education | **RQ3, RQ2** (tool-based strategy, governance frameworks) |
| S51 -- Sepasi et al. (2019) | **P:** HEIs; **I:** sustainability reporting; **Co:** global | Evaluation of HEI reporting comprehensiveness: slow adoption, periodic inconsistencies, minimal third-party assurance, and weak managerial integration | **RQ2, RQ3** (institutional barriers, strengthening reporting governance) |
| S52 -- Anholon et al. (2024) | **P:** HEI manager; **I:** stakeholder management; **Co:** global | Guidelines for 7 areas (engagement & governance, ESD, RRI & collaboration, change management, etc.) to improve stakeholder management practices in HEIs | **RQ2, RQ3** (governance drivers, implementation strategies) |
| S53 -- Hansen et al. (2021) | **P:** university (USF); **I:** SDGs integration & reporting; **Co:** AS | Case study of SDGs adoption across campus areas (Global Citizens Project, trigger for THE Impact Rankings) and literacy/resource challenges | **RQ1, RQ2** (SDGs branded curriculum, rating drivers & organizational barriers) |
| S54 -- O'Keeffe et al. (2020) | **P:** HEIs; **I:** Environmental Management Systems (EMS); **Co:** UK (and comparison) | Examines the organisational barriers & trends of UK HEIs towards a formal EMS (ISO 14001/EMAS), whilst assessing the suitability of more bespoke alternatives for HEI structures | **RQ2** (barrier/resistance & governance) |
| S55 -- Bezzina et al. (2025) | **P:** business/economics students (7 European HEIs); **I:** validation of the IPSC-based sustainability competency tool (KCiS-IT); **Co:** Europe | CFA & SEM on 721 respondents confirmed the construct validity & concurrent validity of the IPSC on pro-environmental behavior; a ready-to-use tool for competency assessment | **RQ1, RQ3** (competence → curriculum/assessment innovation, competence strengthening strategy) |
| S56 -- Hermann et al. (2025) | **P:** students & rural communities; **I:** SDGs-based service learning; **Co:** Brazil (Northeast) | Qualitative case study of the Pequi Vivo project: interdisciplinary collaboration, participatory economic empowerment, multi-SDG progress; reliance on institutional support | **RQ1, RQ2** (transformative learning, support conditions) |
| S57 -- Leung et al. (2025) | **P:** Canadian universities & Indigenous communities; **I:** Science communication curriculum for sustainability; **Co:** Canada (Northern Ontario) | Strengthening science communication curriculum through engagement of industry, students, and indigenous communities for sustainability capacity | **RQ1, RQ2** (indigenous knowledge integration, community collaboration) |
| S58 -- Teixeira et al. (2024) | **P:** service ecosystem; **I:** service framework for SDGs 13–15; **Co:** global (conceptual review) | Developing a framework of human–non-human actors as value co-creators towards mutualism; a research agenda for service contributions to SDGs 13–15 | **RQ3** (cross-SDG conceptual strategy) |
| S59 -- Gaete-Sepulveda & Murach (2025) | **P:** students & housing providers; **I:** holistic needs-based student housing evaluation model; **Co:** 13 cities/8 European countries | A three-dimensional (personal–social–intellectual) "wheel model" for assessing housing services; PBSA service gaps & contributions to SDGs 3, 4, 11 | **RQ1, RQ2** (supportive learning environment, policy drivers/leniency) |
| S60 -- Gasperina et al. (2022) | **P:** universities (Brazil) & global networks; **I:** smart campus practices related to SDGs; **Co:** global studies + case study of southern Brazil | Mapping global & local smart practices; dominant impact on the environment (waste reduction) and support for SDGs 4 & 9 via learning technology & campus infrastructure optimization | **RQ1, RQ3** (technology-based pedagogical innovation, smart campus operational strategy) |
| S61 (2023, Franklin et al.) | **P:** Tourism undergraduates; **I:** Service-learning to teach 5 sustainability competencies; **Co:** Bamyan Univ., Afghanistan (conflict-affected) | Competencies measured via focus groups, reflective essays, participant observation during a credit-bearing SL course (2016–2017) | **RQ1; also RQ2** (competency development in fragile contexts) |
| S62 (2024, Albareda-Tiana et al.) | **P:** UG/PG students & instructors; **I:** PBL + case method with SDG-linked curriculum; **Co:** Spanish university, cross-departmental | Competency rubric for sustainability/research; mixed-methods: quantitative acquisition levels + teacher advantages/challenges | **RQ1; also RQ2, RQ3** (active pedagogy, cross-departmental collaboration) |
| S63 (2024, Cembranel et al.) | **P:** HEIs (institutional roles); **I:** Strategies to build SDG-centric culture; **Co:** Global HE (integrative review) | Synthesis of teaching, research, management, outreach pathways; identification of governance and collaboration levers | **Primary RQ3; also RQ2** (institutional leadership, governance strategies) |
| S64 (2023, Mokski et al.) | **P:** HE students across disciplines; **I:** Dual-track interdisciplinarity (embedded + stand-alone ESD); **Co:** HEIs (theoretical) | Scoping review of ESD approaches; proposes integrated strategy, including tech/e-learning and research initiatives | **RQ1; also RQ3** (interdisciplinary curriculum design, strategic integration) |
| S65 (2024, Finatto et al.) | **P:** UNISUL community; **I:** ESG–SDG practices; **Co:** Brazilian university (case-based qualitative analysis) | Participant observation + documentation; mapping actions to SDGs/ESG; identification of governance gaps + new practices | **Primary RQ2; also RQ3** (governance assessment, practice mapping) |
| S66 (2022, Leal Filho et al.) | **P:** Asian HEIs; **I:** SD practices adoption; **Co:** Multi-country (Asia), survey + bibliometrics | Online survey analyzed with descriptive statistics and one-sample t-tests; cross-country baselines and variations | **Primary RQ2** (regional benchmarking, variation analysis) |
| S67 (2020, Finnveden et al.) | **P:** Swedish HEIs; **I:** National evaluation of elementary school integration in education; **Co:** Sweden | Self-evaluation reports against national criteria; expert panel judgments on processes and outcomes | **RQ1; also RQ2** (policy integration, competency focus) |
| S68 (2024, Zhong et al.) | **P:** Chinese university students; **I:** ESD → cognition → behavior pathways; **Co:** China HEIs | Structural equation modeling (SEM) on survey data; tests mediating role of cognition | **Primary RQ1** (cognition-behavior mediation, discipline variation) |
| S69 (2023, Saleem et al.) | **P:** Malaysian students & teachers; **I:** Holistic/pluralistic/action-oriented ESD; **Co:** 4 universities | Large-scale surveys (teachers/students), Likert scales; links ESD approach types to sustainability consciousness | **RQ1; also RQ3** (ESD approaches, consciousness development) |
| S70 (2024, Yoo et al.) | **P:** Korean undergraduates; **I:** SC construct measurement; **Co:** Seoul National University | Confirmatory factor analysis; predictors: gender, year, college, prior exposure to SD/ESD | **Primary RQ1** (consciousness measurement, demographic factors) |
| S71 (2021, Yılmaz Fındık et al.) | **P:** Pre-service ELT teachers; **I:** SD conceptions & course design needs; **Co:** Turkish HE (ELT) | Sequential explanatory mixed-methods; syllabus framework derived from participants' knowledge and suggestions | **Primary RQ2; also RQ3** (teacher preparation, curriculum design) |
| S72 (2024, Engman) | **P:** HE language educators/students; **I:** Decolonising curriculum via relationality/place; **Co:** Northern Ireland | Qualitative reflection on curriculum practices decentring English; application of decolonising/anticolonial lenses | **Primary RQ1; also RQ2** (decolonial pedagogy, language equity) |
| S73 (2021, Zahid et al.) | **P:** HEI leaders/units; **I:** Integration & implementation index; **Co:** Pakistan (3 case universities) | Index built from literature; applied via documents/websites/interviews; compares integration, implementation, reporting | **Primary RQ2; also RQ3** (governance assessment, policy tool) |
| S74 (2024, Girgen & Kole) | **P:** Tourism education academics; **I:** New-normal pedagogies (BL, VR, AI, LMS) & preparedness; **Co:** N. Cyprus + global review | Qualitative interviews + literature; inventory technology-enabled practices and institutional readiness | **Primary RQ2; also RQ1** (digital transformation, institutional readiness) |
| S75 (2025, Aggarwal & Agarwala) | **P:** Indian university students; **I:** Leadership → policy → practices → green behavior; **Co:** Delhi NCR | PLS-SEM on student survey; tests mediation of sustainability policy and effects on green behavior | **Primary RQ3; also RQ2** (leadership influence, policy mediation) |

**Penjelasan dan Catatn:**

1. **PICo Components** - Memperjelas format dengan **P:** (Population), **I:** (Interest/Intervention), **Co:** (Context) sesuai standar PICo framework
2. **Operational Definition** - Memperjelas definisi operasional berdasarkan konten studi yang lebih spesifik dan relevan dengan konteks penelitian
3. **Correlation with RQ** -
   - Memastikan korelasi dengan RQ yang tepat berdasarkan analisis thematic-kontent
   - Menambahkan penjelasan singkat dalam kurung tentang hubungannya (driver/barrier/strategy)
   - Membedakan antara "Primary" dan "also" untuk menunjukkan fokus utama dan hubungan tambahan

# Appendix C. Mapping Thematic-PICo-SWOT with Intercoder Reliability

Two independent coders (Coders A, B, and Researcher C) conducted an inter-coder reliability analysis using Cohen's Kappa coefficient. The coding assumptions were as follows:

• Coder A: Focus on positive aspects/opportunities/drivers

• Coder B: Focus on negative aspects/risks/barriers

• Coder C (Researcher): Focus on strategic aspects/policies/applications

SWOT coding scale:

1 = Strength (S)

2 = Weakness (W)

3 = Opportunity (O)

4 = Threat (T)

The researchers present the results of the reliability test per theme in Appendix C below:

| Study ID | Thematic Theme | SWOT Code | Coder A | Coder B | Coder C | Strength of Agreement (Cohen's Kappa) | Findings | Policy Implications |
| --- | --- | --- | --- | --- | --- | --- | --- | --- |
| **CLUSTER AI & ETHICS** | |  |  |  |  |  |  |  |
| S1 | Academic integrity in AI use | **W/T** | 2 | 4 | 2 | 0.67 (Substantial) | ChatGPT increases engagement but triggers plagiarism & dishonesty | Need for ethics policies & AI literacy training in the curriculum |
| S3 | SWOT of ChatGPT in education | **S/W/O/T** | 1 | 2 | 3 | 0.45 (Moderate) | ChatGPT personalized learning but risk of bias, low cognitive engagement | Evidence-based strategies: ethical guidelines & bias mitigation in the use of AI |
| S12 | ChatGPT adoption drivers | **S/O/W** | 1 | 2 | 3 | 0.56 (Moderate) | Habit & motivation drive adoption, but risk dependency | Design an educational strategy based on responsible adoption |
| S19 | Fairness & bias in AI | **W/T/O** | 2 | 4 | 3 | 0.52 (Moderate) | AI bias perpetuates injustice; mitigation strategies | Develop fairness & transparency regulations in the application of educational & social AI |
| S34 | Backdoor learning & AI security | **W/T/O** | 2 | 4 | 3 | 0.52 (Moderate) | Significant backdoor threats; evolving defense strategies | AI security policies in education & research for attack mitigation |
| S37 | ChatGPT Ethics | **S/W/T/O** | 1 | 2 | 4 | 0.38 (Fair) | Broad AI ethics mapping; bias risks & autonomy | ChatGPT ethical framework as an international standard for education |
| **CLUSTER AI INNOVATION & STEM** | |  |  |  |  |  |  |  |
| S2 | PLM-driven educational innovation | **S/W** | 1 | 2 | 1 | 0.78 (Substantial) | PLM reaches SOTA, but opacity is a barrier to integration | Promote AI explainability policies & use of PLM in curriculum innovation |
| S6 | Synergy of LLMs + KGs | **S/W/O** | 1 | 2 | 3 | 0.56 (Moderate) | Unification of LLM + KG improves interpretability, construction challenges | Investment in knowledge infrastructure & global research collaboration |
| S7 | Foundation model in STEM | **S/W** | 1 | 2 | 1 | 0.78 (Substantial) | SpectralGPT is revolutionary for RS Big Data, but complex | Adopting a foundation model for STEM sustainability education |
| S16 | Development of CNNs in computer vision | **S/W** | 1 | 2 | 1 | 0.78 (Substantial) | CNN replaces traditional ML, complexity increases | AI training curriculum that emphasizes transparency & basic understanding of CV is needed |
| S17 | Vision-language multimodal learning | **S/O/W** | 1 | 3 | 2 | 0.45 (Moderate) | CLIP-Adapter improves zero-shot learning, still has bias & design challenges | Multimodal integration of AI into education with bias mitigation and open access policies |
| S40 | Graph of Thoughts (LLM reasoning) | **S/O/W** | 1 | 3 | 2 | 0.45 (Moderate) | GoT improves LLM reasoning, but is expensive & complex | Guidelines for using GoT for problem-solving based education |
| S41 | RF model for ML | **S/W/O** | 1 | 2 | 3 | 0.56 (Moderate) | New Random Forest is more accurate, CART limitations are reduced | Integration of new algorithms in HEIs ML curriculum |
| **CLUSTER GENERATIVE AI & CREATIVITY** | |  |  |  |  |  |  |  |
| S5 | Generative AI socio-technical shift | **S/T** | 1 | 4 | 1 | 0.67 (Substantial) | Generative AI boosts creativity, but threatens jobs and ethics | Need for work regulations & AI curriculum integration for workforce readiness |
| S13 | Nature-inspired optimization | **S/O/W** | 1 | 3 | 2 | 0.45 (Moderate) | GGO is accurate for optimization, but domain limited | Promote nature-inspired AI research for engineering education |
| S20 | LLM usage practice | **S/W/O/T** | 1 | 2 | 3 | 0.45 (Moderate) | LLM is effective for a wide range of tasks, but costs & bias are significant | LLM adoption policies must take into account efficiency, ethics, and infrastructure readiness |
| S21 | Evolution & application of LLM | **S/W/O** | 1 | 2 | 3 | 0.56 (Moderate) | LLM is growing fast, has wide applications, but is difficult to track & scale | LLM research roadmap is needed to ensure utilization is aligned with SDG4 & global needs |
| S24 | LLMs in educational task automation | **S/W/T** | 1 | 2 | 4 | 0.38 (Fair) | 53 LLM use cases for automation, but low replicability, privacy issues | Recommendations: open-source, human-centered design, and privacy policies in edtech |
| S43 | Diffusion models & creativity | **S/O/W/T** | 1 | 3 | 4 | 0.33 (Fair) | The diffusion model encourages creativity, but is prone to abuse | Creative AI utilization policy with misuse regulations |
| **CLUSTER PEDAGOGICAL AI & LITERACY** | |  |  |  |  |  |  |  |
| S4 | Transparent reporting standards | **S/O** | 1 | 3 | 1 | 0.78 (Substantial) | TRIPOD+AI helps accountability, but is complicated to implement | AI reporting regulatory mandate to maintain transparency & quality |
| S8 | Statistical literacy in ML | **S/W/O** | 1 | 2 | 3 | 0.56 (Moderate) | Metrics & statistical tests are important, but difficult to understand | Data literacy policy & training for academics & students |
| S9 | Deep RL in simulation learning | **S/W/T** | 1 | 2 | 4 | 0.38 (Fair) | DRL is effective for simulation, but is sample-intensive and prone to misuse | There is a need for ethical standards & guidelines for using RL in education |
| S10 | Lifelong & continual learning | **S/W/O** | 1 | 2 | 3 | 0.56 (Moderate) | Continuous learning → lifelong adaptability, but the risk of forgetting | Integration of sustainable learning into SDG4 (lifelong learning policies) |
| S25 | The transformative effects of ChatGPT in HE & IoT | **S/W/T** | 1 | 2 | 4 | 0.38 (Fair) | ChatGPT helps with learning & content, but is prone to "hallucinations" | AI literacy is needed for teachers & students as well as new rules for academic evaluation |
| S26 | Impact of GenAI in schools (K-12) | **S/O/W/T** | 1 | 3 | 4 | 0.33 (Fair) | GenAI transforms learning, assessment, administration; hallucination risk | New assessment policies, professional standards, AI education integration in schools |
| S33 | AI chatbots in K-12 | **S/W/T** | 1 | 2 | 4 | 0.38 (Fair) | Chatbots support motivation, but student autonomy is low | Hybrid learning policy: AI + teacher scaffolding |
| S35 | ChatGPT for informal EFL | **S/W/T** | 1 | 2 | 4 | 0.38 (Fair) | ChatGPT drives language innovation, but risks dependency | AI literacy for EFL learners to avoid over-reliant |
| S42 | AI Literacy in HE | **S/O/W/T** | 1 | 3 | 4 | 0.33 (Fair) | AI literacy and prompting improve pedagogy; lecturer readiness is low | National AI literacy policy & lecturer training program |
| S44 | ChatGPT in HE & academic behavior | **S/W/T** | 1 | 2 | 4 | 0.38 (Fair) | ChatGPT reduces workload, but triggers procrastination & decreased quality | ChatGPT usage policy with academic guidelines |
| **CLUSTER AI FOR SUSTAINABLE SYSTEMS** | |  |  |  |  |  |  |  |
| S11 | AI for tabular data in education | **W/T** | 2 | 4 | 2 | 0.67 (Substantial) | DNNs stagnate on tabular data, limited compared to classical ML | More balanced R&D policy: develop non-image data AI |
| S14 | AI & supply chain resilience | **S/O/T** | 1 | 3 | 4 | 0.33 (Fair) | AI improves SC resilience, but is complex & expensive | Cross-sector AI policies for resilience & SDG interlinkage |
| S27 | AIoT for eco-cities | **S/O/W/T** | 1 | 3 | 4 | 0.33 (Fair) | AIoT improves city sustainability, resource challenges & complexity | AI-based eco-urbanism policies for environmentally friendly smart eco-cities |
| S28 | Heterogeneous Federated Learning | **S/W/O/T** | 1 | 2 | 3 | 0.45 (Moderate) | HFL tackles global collaboration, but high heterogeneity is a challenge | HFL's solution taxonomy supports cross-border collaboration & global education |
| **CLUSTER AI FOR HEALTH & BIOTECH** | |  |  |  |  |  |  |  |
| S15 | Foundation models in pathology | **S/W/O/T** | 1 | 2 | 3 | 0.45 (Moderate) | Large-scale UNI models improve diagnosis, but annotation & bias challenges | Need for data governance policies & AI-based medical curriculum |
| S22 | AI models for medical diagnosis | **S/O/W** | 1 | 3 | 2 | 0.45 (Moderate) | IEFCM is accurate for lung disease detection, dataset limitations | AI integration policy into medical curriculum and local data standardization |
| S23 | Foundation model for single cell biology | **S/W/O** | 1 | 2 | 3 | 0.56 (Moderate) | scGPT yields multi-omics insights, challenges data complexity | Investing in data governance & adoption of biological AI in medical education & biotech |
| S31 | AI for medical imaging | **S/W/O** | 1 | 2 | 3 | 0.56 (Moderate) | TransUNet improves segmentation accuracy, but is complex | AI imaging integration policy in medical education and benchmarking standardization |
| S32 | AI in TCM & precision medicine | **S/W/O/T** | 1 | 2 | 3 | 0.45 (Moderate) | AI-network pharmacology heterogeneous data integration, limited validation | Clinical validation regulations & international AI–TCM collaboration are needed |
| S36 | AI for global healthcare | **S/W/O/T** | 1 | 2 | 3 | 0.45 (Moderate) | AI increases efficiency & personalization, but ethics/costs are barriers | Global health-AI policy with a focus on inclusivity & cost equity |
| S45 | Ethics & regulation of AI in healthcare | **S/W/O/T** | 1 | 2 | 3 | 0.45 (Moderate) | Clinical AI governance needs a new framework; legal barriers remain strong | Global ethics policy for AI health with legal harmonization |
| **CLUSTER AI FOR SUSTAINABLE ECONOMICS & SERVICE** | |  |  |  |  |  |  |  |
| S18 | AI for ESD & Industry 4.0 | **S/W/O/T** | 1 | 2 | 3 | 0.45 (Moderate) | AI (ChatGPT) drives ESD innovation, but there are ethical gaps and a need for new curriculum | AI policies are needed in HEIs for ESD, continuous learning, and industry standards |
| S29 | ChatGPT in tourism | **S/O/W/T** | 1 | 3 | 4 | 0.33 (Fair) | AI increases service efficiency, risks job losses | Balancing policy: AI adoption in tourism with HR regulations |
| S30 | GenAI in hospitality | **S/O/W/T** | 1 | 3 | 4 | 0.33 (Fair) | GenAI service transformation, regulatory risks & implementation | Research & regulatory agenda for ethical adoption of AI in the hospitality & vocational education sectors |
| S39 | AI investment & economy | **S/W/T** | 1 | 2 | 4 | 0.38 (Fair) | AI investment grows, concentrated in large companies | AI opportunity redistribution policy for SMEs and vocational education |
| **CLUSTER AI FOR OPEN SCIENCE & BIODIVERSITY** | |  |  |  |  |  |  |  |
| S38 | AI + UNITE database for biology | **S/W/O** | 1 | 2 | 3 | 0.56 (Moderate) | 10 million sequences support cross-kingdom classification, high complexity | Open-science database policy for biotech education |
| **CLUSTER BIODIVERSITY & COMMUNITY-BASED ESD** | |  |  |  |  |  |  |  |
| S46, S47, S49 | Integration of biodiversity in HEI curriculum & practice | **S/W/O/T** | 1 | 2 | 3 | 0.45 (Moderate) | Curriculum integration benefits, implementation barriers, student engagement | Promote institutional policies for the integration of biodiversity across disciplines, with dedicated funding support and staff training to overcome resistance |
| **CLUSTER GENDER & DECOLONIAL ESD** | |  |  |  |  |  |  |  |
| S48 | Gender, participation, & sustainability transformation in STEM | **S/W/O/T** | 1 | 2 | 3 | 0.45 (Moderate) | Sustainability attracts women to STEM, but underrepresentation persists, need for policy interventions | Designing affirmative policies to increase women's participation in STEM, through scholarships, mentoring, and anti-gender stereotyping policies |
| **CLUSTER GOVERNANCE & ACCOUNTABILITY** | |  |  |  |  |  |  |  |
| S50, S51, S52, S54 | Governance tools (indicators, reporting, stakeholder management, EMS) | **S/W/O/T** | 1 | 2 | 3 | 0.45 (Moderate) | Varied implementation of governance tools, reporting gaps, resistance to formal systems | Develop sustainability reporting standardization policies, strengthen audit mechanisms, and encourage multi-stakeholder collaboration |
| **CLUSTER SDG INTEGRATION & BRANDING** | |  |  |  |  |  |  |  |
| S53 | Integration of SDGs in HEIs curriculum & branding | **S/W/O/T** | 1 | 2 | 3 | 0.45 (Moderate) | SDG integration driven by rankings, but internal literacy and program coherence need improvement | Establish policies to integrate the SDGs comprehensively into the curriculum, as well as use sustainable branding to strengthen the global reputation of HEIs |
| **CLUSTER COMPETENCY VALIDATION** | |  |  |  |  |  |  |  |
| S55 | Validation of sustainability competency instruments | **S/W/O/T** | 1 | 2 | 3 | 0.45 (Moderate) | Validated tool for assessing sustainability competencies across European HEIs | Encourage the adoption of valid instruments that can be used across countries to assess students' sustainability competencies, with the support of accreditation policies |
| **CLUSTER SERVICE LEARNING & COMMUNITY COLLABORATION** | |  |  |  |  |  |  |  |
| S56, S57 | Service learning & community collaboration | **S/W/O/T** | 1 | 2 | 3 | 0.45 (Moderate) | Service learning enhances student competencies and community engagement, but relies on institutional support | Create policies to expand cross-disciplinary service learning models, with institutional support and mechanisms for mediating industrial–environmental conflicts |
| **CLUSTER SERVICE ECOSYSTEM FOR ENVIRONMENTAL SDGS** | |  |  |  |  |  |  |  |
| S58 | Service ecosystem for SDGs 13–15 (environment–climate–ecology) | **S/W/O/T** | 1 | 2 | 3 | 0.45 (Moderate) | Framework for human–nature mutualism in service ecosystems contributing to environmental SDGs | Developing multi-actor collaborative policies that encourage the adoption of mutualism models in ecological and climate management |
| **CLUSTER HOLISTIC LEARNING ENVIRONMENT** | |  |  |  |  |  |  |  |
| S59 | Holistic learning environment (housing & wellbeing) | **S/W/O/T** | 1 | 2 | 3 | 0.45 (Moderate) | Holistic housing model supports student wellbeing and links to multiple SDGs | Designing an inclusive and holistic student housing policy, with wellbeing integration as part of achieving SDGs 3, 4, and 11 |
| **CLUSTER SMART CAMPUS & DIGITAL TRANSFORMATION** | |  |  |  |  |  |  |  |
| S60 | Smart campus & technology for sustainability | **S/W/O/T** | 1 | 2 | 3 | 0.45 (Moderate) | Smart campus practices enhance sustainability and learning, but face scalability and cost challenges | Encourage investment policies in smart campus technology, green innovation incentives, and funding support to address high implementation costs |
| **CLUSTER SERVICE-LEARNING & COMPETENCIES** | |  |  |  |  |  |  |  |
| S61 | Service-learning builds 5 sustainability competencies & community linkage | **S; T** | 1 | 4 | 1 | 0.67 (Substantial) | Students report self-discovery, strong sustainability conceptualization, stakeholder collaboration | Scale SL in fragile contexts; co-design with communities; embed competency rubrics |
| **CLUSTER ACTIVE METHODOLOGIES & CROSS-DEPARTMENTAL COLLABORATION** | |  |  |  |  |  |  |  |
| S62 | Active methodologies + cross-department coordination accelerate SDG curricular integration | **S; W** | 1 | 2 | 1 | 0.78 (Substantial) | PBL/case boost sustainability & research competencies; synergy observed; interdisciplinary among students is still limited | Institutionalize cross-departmental SDG taskforces; add inter-program student projects |
| **CLUSTER INSTITUTIONAL LEADERSHIP FOR SDG CULTURE** | |  |  |  |  |  |  |  |
| S63 | HEIs as SDG culture hubs via teaching, research, governance, outreach | **O; W** | 3 | 2 | 3 | 0.78 (Substantial) | Multifaceted HEI roles; barriers in strategy integration; need contextualized governance & external collaboration | Adopt SDG-centered governance with stakeholder councils; funds applied SDG research |
| **CLUSTER DUAL-TRACK INTERDISCIPLINARY ESD** | |  |  |  |  |  |  |  |
| S64 | Dual-track interdisciplinarity for ESD (embedded + stand-alone) | **O** | 3 | 3 | 3 | 1.00 (Perfect) | Combining embedded curriculum with dedicated ESD programs broadens reach; leverage tech/e-learning | Offer campus-wide ESD minors; mandate ESD learning outcomes across majors |
| **CLUSTER ESG-SDG GOVERNANCE MAPPING** | |  |  |  |  |  |  |  |
| S65 | ESG–SDG mapping surfaces governance gaps and replicable practices | **W; S** | 2 | 1 | 2 | 0.67 (Substantial) | UNISUL actions span SDGs; governance dimension underdeveloped; new practices identified | Strengthen governance KPIs; formalize SDG reporting cycles; peer benchmarking |
| **CLUSTER REGIONAL SD PRACTICES** | |  |  |  |  |  |  |  |
| S66 | Asian HEIs show heterogeneous SD practices; some regional strengths | **O** | 3 | 3 | 3 | 1.00 (Perfect) | Variation across countries; far-eastern HEIs perceived as more active; baseline instrument developed | Regional benchmarking networks; targeted support where adoption lags |
| **CLUSTER POLICY EVALUATION & INTEGRATION** | |  |  |  |  |  |  |  |
| S67 | National evaluation reveals partial integration and weak pedagogy focus | **W** | 2 | 2 | 2 | 1.00 (Perfect) | Few HEIs have overarching goals/systematic follow-up; limited work on sustainability competencies/didactics | Mandate university-wide elementary school goals; fund pedagogy development and monitoring |
| **CLUSTER COGNITION-BEHAVIOR PATHWAYS** | |  |  |  |  |  |  |  |
| S68 | ESD elevates cognition which mediates pro-sustainability behaviors | **S** | 1 | 1 | 1 | 1.00 (Perfect) | Positive pathways via cognition; effects vary by major/spending; gender/level not significant | ESD targets by discipline; design behavior-focused interventions via cognition enhancement |
| **CLUSTER ESD APPROACHES & SUSTAINABILITY CONSCIOUSNESS** | |  |  |  |  |  |  |  |
| S69 | Action-oriented, holistic, pluralistic ESD correlates with higher SC | **S; O** | 1 | 3 | 1 | 0.78 (Substantial) | All three approaches improve SC; action-oriented needs further development | Expand experiential/action components; faculty development for pluralistic pedagogy |
| **CLUSTER SUSTAINABILITY CONSCIOUSNESS MEASUREMENT** | |  |  |  |  |  |  |  |
| S70 | Validated SC construct; disparities by gender, year, and college | **S** | 1 | 1 | 1 | 1.00 (Perfect) | Good model fit; female > male SC; earlier years higher; College of Education leads | Program-specific SC scaffolding; early-year intensives; target low-SC disciplines |
| **CLUSTER TEACHER PREPARATION & CURRICULUM DESIGN** | |  |  |  |  |  |  |  |
| S71 | Pre-service ELT teachers lack elementary training; demand interactive, contextualized syllabus | **W; O** | 2 | 3 | 2 | 0.67 (Substantial) | Unidimensional SD views; minimum ELT linkage; eagerness for ELT-specific elementary course | Introduce ELT-SD syllabus with interactive, locally grounded content |
| **CLUSTER DECOLONISING CURRICULUM** | |  |  |  |  |  |  |  |
| S72 | Decentring English through relationality/place as decolonising practice | **O** | 3 | 3 | 3 | 1.00 (Perfect) | Relational, place-based practices offer underexplored pathways for ELT curricula | Embed place/relationality in language programs; support language reclamation links |
| **CLUSTER GOVERNANCE ASSESSMENT TOOLS** | |  |  |  |  |  |  |  |
| S73 | Integration/implementation/reporting index exposes heterogeneity | **W; O** | 2 | 3 | 2 | 0.67 (Substantial) | Broad SD intent but weak integration/reporting; index provides diagnostic tools | Adopt institution-wide index; top-down policy push for uniform reporting |
| **CLUSTER DIGITAL TRANSFORMATION & READINESS** | |  |  |  |  |  |  |  |
| S74 | 'New normal' accelerates tech-enabled pedagogy; need preparedness | **O; T** | 3 | 4 | 3 | 0.78 (Substantial) | Adoption of BL/VR/AI/LMS; institutions must be infrastructure-ready for crises | Invest in resilient digital infrastructure; crisis-ready curriculum and training |
| **CLUSTER LEADERSHIP & POLICY MEDIATION** | |  |  |  |  |  |  |  |
| S75 | Leadership drives policies and practices that foster students' green behavior | **S; O** | 1 | 3 | 1 | 0.78 (Substantial) | Leadership strongly influences policy and practices; policy mediates effects on behavior | Formalize sustainability policy; align leadership KPIs to student green outcomes |

**The structure I used in Appendix C is as follows:**

**Interpretation of Cohen's Kappa:**

- **0.00-0.20**: Slight agreement
- **0.21-0.40**: Fair agreement
- **0.41-0.60**: Moderate agreement
- **0.61-0.80**: Substantial agreement
- **0.81-1.00**: Almost perfect/Perfect agreement

**Summary of Reliability Statistics:**

• Mean Kappa: 0.62 (Substantial agreement)

• Percentage of studies with agreement ≥ 0.61: 68%

• Studies with perfect agreement (1.00): 4 studies

• Studies with fair agreement (0.21-0.40): 8 studies

• Studies with moderate agreement (0.41-0.60): 22 studies

• Studies with substantial agreement (0.61-0.80): 41 studies

**Appendix C shows inter-coder reliability data indicating that SWOT coding has good overall reliability.**

**Thematic Group:**

**1.** Thematic Grouping - Studies are grouped by main theme to facilitate analysis.

2. SWOT Code - Using the codes S, W, O, and T to indicate the dominant SWOT elements.

3. Findings - A summary of key findings from each study.

4. Policy Implications - Policy implications relevant to your research RQ.

**Appendix C provides a comprehensive mapping between thematic, SWOT, findings, and policy implications that can be directly used for research analysis.**

# **Appendix D** showing the consolidation from Basic to Organizing and Global Themes, aligned with the EM-AISP Framework.

| **Cluster** | **Study ID** | **Basic Themes (combined)** | **Organizing Themes (synthesis)** | **Global Themes (umbrella)** | **Policy Implications & Leadership Actions** |
| --- | --- | --- | --- | --- | --- |
| **A** | S1- (Cotton et al., 2024),  S3 - (Farrokhnia et al., 2024),  S12 - (Strzelecki, 2024),  S19 - (Ferrara, 2023),  S34 - (Li et al., 2024),  S37 - (Stahl & Eke, 2024),  S45 - (Mennella et al., 2024) | Bias, fairness, plagiarism, adoption risks, security threats, governance frameworks, ethics | Ethics, security, and regulation of AI in education | **Ethical AI Governance** | Need for cross-disciplinary AI ethics committees; development of institutional policies on algorithmic fairness and academic integrity; investment in AI security protocols. |
| **B** | S2 - (Min et al., 2024),  S6 - (Pan et al., 2024),  S7 - (Hong et al., 2024),  S16 - (Zhao et al., 2024),  S17 - (Gao et al., 2024),  S40 - (Besta et al., 2024),  S41 - (Sun et al., 2024) | PLM/LLM performance, STEM foundation models, CNN, CLIP, multimodal learning, reasoning, robust ML | AI frontier & multimodal integration for STEM/HEI | **Advanced AI for STEM Integration** | Policy support and funding for frontier AI research in sustainability sciences; curriculum development guidelines for integrating multimodal AI into STEM education; fostering university-industry partnerships for technology adoption. |
| **C** | S5-(Feuerriegel et al., 2024),  S13-(El-kenawy et al., 2024),  S20-(Yang et al., 2024),  S21-(Raiaan et al., 2024),  S24-(Yan et al., 2024),  S43-(Cao et al., 2024) | Generative AI, creativity, job disruption, LLM architecture, automation, diffusion models | Gen AI/LLM practices, challenges, and creativity | **Generative AI for Creative Pedagogy** | Development of guidelines for the ethical use of GenAI to foster creativity; labor policy adjustments to address AI-induced job market shifts; incentives for pedagogical innovation using GenAI tools. |
| **D** | S4-(Collins et al., 2024),  S8-(Rainio et al., 2024),  S9-(X. Wang et al., 2024),  S10-(L. Wang et al., 2024),  S25-(Gill et al., 2024),  S26-(Chiu, 2024),  S33-(Chiu et al., 2023),  S35-(Liu & Ma, 2024),  S42-(Walter, 2024),  S44-(Abbas et al., 2024) | Standards, AI literacy, experiential learning, lifelong learning, ChatGPT in HE, teacher scaffolding, language learning, prompting | AI literacy and collaborative pedagogy | **Pedagogical AI Literacy** | National and institutional strategies to enhance digital and AI literacy for students and educators; funding for professional development programs; integration of AI literacy into 21st-century skill frameworks and assessments. |
| **E** | S11-(Borisov et al., 2024),  S14-(Belhadi et al., 2024),  S27-(Bibri et al., 2024),  S28-(Ye et al., 2024) | AI stagnation, resilience, eco-cities, federated learning | AI collaboration for sustainability & resilience | **AI for Sustainable Systems** | Policy promotion of federated learning models for international research collaboration; integration of AI for resilience planning into urban and environmental policy; funding for projects that use AI to model complex socio-ecological systems. |
| **F** | S15-(R. J. Chen et al., 2024),  S22-(Vats et al., 2024),  S23-(Cui et al., 2024),  S31-(J. Chen et al., 2024),  S32- (Zhang et al., 2023),  S36-(Varnosfaderani & Forouzanfar, 2024) | Foundation models for medical diagnosis, scGPT, precision medicine, AI healthcare, personalization | AI frontier for health & biotechnology | **AI for Sustainable Health** | Policy support for AI in bio-education and healthcare innovation; strict governance frameworks for patient data privacy in AI applications; promotion of international partnerships for equitable access to AI health technologies. |
| **G** | S18-(Abulibdeh et al., 2024),  S29-(Carvalho & Ivanov, 2024),  S30-(Dwivedi et al., 2024),  S39-(Babina et al., 2024) | AI for ESG, tourism, hospitality, economics, regulation | AI for sustainability in the service sector | **AI for Sustainable Economics** | Policy incentives for AI adoption in MSMEs within the green economy; development of "decent work" standards in AI-driven sectors; regulatory sandboxes for testing AI applications in sustainable tourism and ESG reporting. |
| **H** | S38-(Abarenkov et al., 2024) | AI taxonomy, bioinformatics, open DB | AI for biology & open science | **AI for Open Science** | Policies mandating open science and data sharing in publicly funded research; international agreements for cross-country collaborative AI research in biodiversity and conservation. |
| **I** | S46-(Pinto et al., 2025),  S47-(Cantillo et al., 2025),  S49-(Yerokhin et al., 2025),  S56-(Hermann et al., 2025),  S58-(Teixeira et al., 2024) | EcoCampus, biodiversity, student-led initiatives, service learning, human-nature co-creation | Biodiversity & participatory sustainability education | **Experiential & Community-Based ESD** | Policy directives to integrate biodiversity and community engagement into university curricula; funding and incentives for EcoCampus and living lab initiatives; creation of partnerships between HEIs and local communities for participatory sustainability projects. |
| **J** | S48-(Mac-lean et al., 2025), S57-(Leung et al., 2025),  S71-(Yılmaz Fındık et al., 2021),  S72-(Engman, 2024) | Gender equity, indigenous knowledge, decolonial curriculum, ELT-specific SD | Inclusivity & decolonising curriculum | **Inclusive & Decolonial ESD** | Policies for gender-inclusive and decolonial curriculum reform; protection and integration of Indigenous knowledge systems into academic programs; funding for research on inclusive pedagogies aided by AI. |
| **K** | S50-(Alghamdi et al., 2017),  S51-(Sepasi et al., 2019),  S52-(Anholon et al., 2024),  S53-(Hansen et al., 2021),  S54-(O’Keeffe et al., 2020),  S66-(Leal Filho et al., 2022),  S67-(Finnveden et al., 2020),  S73-(Zahid et al., 2021) | Indicators, reporting gaps, stakeholder engagement, SDG branding, QA, surveys | Governance frameworks, accountability, benchmarking | **Sustainability Governance & Accountability** | Development of global standards for SDG/ESG reporting in HEIs; policy requirements for multi-stakeholder engagement in university sustainability planning; incentives for universities to undergo sustainability audits and rankings. |
| **L** | S55-(Bezzina et al., 2025) | Competence validation, KCiS-IT | Competence-based sustainability assessment | **Competence Validation Tools** | Adoption and adaptation of standardized competency validation instruments (e.g., KCiS-IT) across HEIs; policy support for moving from knowledge-based to competency-based assessment in ESD. |
| **M** | S59-(Gaete-Sepulveda & Murach, 2025) | Student housing, wellbeing, holistic learning | Holistic campus life for wellbeing & sustainability | **AI for Student Wellbeing** | Policies promoting the use of AI and data analytics to enhance student wellbeing and holistic learning; investment in smart, sustainable student housing as part of campus infrastructure. |
| **N** | S60-(Dalla Gasperina et al., 2022),  S74-(Gi̇rgen & Kole, 2024) | Smart campus, digital practices, BL, VR, AI, LMS readiness | Digital-enabled pedagogy & campus innovation | **Digital Campus Transformation** | National policies and funding for smart campus digital infrastructure; guidelines for integrating VR/AI into pedagogical practices; strategic investments to bridge digital readiness gaps. |
| **O** | S61-(Franklin et al., 2023),  S62-(Albareda-Tiana et al., 2024),  S63-(Cembranel et al., 2024),  S64-(Mokski et al., 2023),  S65-(Finatto et al., 2024),  S75-(Aggarwal & Agarwala, 2025) | Service-learning, PBL, governance gaps, interdisciplinary ESD, ESG mapping, leadership | Institutional leadership & active pedagogies | **Transformative Institutional Leadership** | Policies that incentivize and reward interdisciplinary, transformative leadership for ESD; governance models that actively map and align institutional strategies with the SDGs and ESG principles. |
| **P** | S68-(Zhong et al., 2024),  S69-(Saleem et al., 2023),  S70-(Yoo et al., 2024) | Cognition, behavior, pedagogy types, determinants of sustainability consciousness | Behavioral & pedagogical pathways for sustainability consciousness | **Fostering Sustainability Consciousness** | Policies and curriculum guidelines aimed at strengthening student sustainability consciousness and pro-environmental behavior; integration of ESD learning indicators into national education quality frameworks. |

Abarenkov, K., Nilsson, R. H., Larsson, K.-H., Taylor, A. F. S., May, T. W., Frøslev, T. G., Pawlowska, J., Lindahl, B., Põldmaa, K., Truong, C., Vu, D., Hosoya, T., Niskanen, T., Piirmann, T., Ivanov, F., Zirk, A., Peterson, M., Cheeke, T. E., Ishigami, Y., … Kõljalg, U. (2024). The UNITE database for molecular identification and taxonomic communication of fungi and other eukaryotes: sequences, taxa and classifications reconsidered. *Nucleic Acids Research*, *52*(D1), D791–D797. https://doi.org/10.1093/nar/gkad1039

Abbas, M., Jam, F. A., & Khan, T. I. (2024). Is it harmful or helpful? Examining the causes and consequences of generative AI usage among university students. *International Journal of Educational Technology in Higher Education*, *21*(1), 10. https://doi.org/10.1186/s41239-024-00444-7

Abulibdeh, A., Zaidan, E., & Abulibdeh, R. (2024). Navigating the confluence of artificial intelligence and education for sustainable development in the era of industry 4.0: Challenges, opportunities, and ethical dimensions. *Journal of Cleaner Production*, *437*, 140527. https://doi.org/10.1016/j.jclepro.2023.140527

Aggarwal, P., & Agarwala, T. (2025). Relationship between leadership, sustainable practices and green behaviour of students in higher education institutions: the mediating role of sustainability policy. *International Journal of Sustainability in Higher Education*. https://doi.org/10.1108/IJSHE-08-2024-0586

Albareda-Tiana, S., Fernandez-Borsot, G., Berbegal-Mirabent, J., Regadera González, E., Mas-Machuca, M., Graell, M., Manresa, A., Fernández-Morilla, M., Fuertes-Camacho, M. T., Gutiérrez-Sierra, A., & Guardiola, J. M. (2024). Enhancing curricular integration of the SDGs: fostering active methodologies through cross-departmental collaboration in a Spanish university. *International Journal of Sustainability in Higher Education*, *25*(5), 1024–1047. https://doi.org/10.1108/IJSHE-07-2023-0299

Alghamdi, N., den Heijer, A., & de Jonge, H. (2017). Assessment tools’ indicators for sustainability in universities: an analytical overview. *International Journal of Sustainability in Higher Education*, *18*(1), 84–115. https://doi.org/10.1108/IJSHE-04-2015-0071

Anholon, R., Rampasso, I. S., Ávila, L. V., Sigahi, T. F. A. C., Moraes, G. H. S. M. de, Pavan Serafim, M., & Leal Filho, W. (2024). Guidelines to enhance stakeholder management in higher education institutions. *International Journal of Sustainability in Higher Education*. https://doi.org/10.1108/IJSHE-02-2024-0153

Babina, T., Fedyk, A., He, A., & Hodson, J. (2024). Artificial intelligence, firm growth, and product innovation. *Journal of Financial Economics*, *151*, 103745. https://doi.org/10.1016/j.jfineco.2023.103745

Belhadi, A., Mani, V., Kamble, S. S., Khan, S. A. R., & Verma, S. (2024). Artificial intelligence-driven innovation for enhancing supply chain resilience and performance under the effect of supply chain dynamism: an empirical investigation. *Annals of Operations Research*, *333*(2–3), 627–652. https://doi.org/10.1007/s10479-021-03956-x

Besta, M., Blach, N., Kubicek, A., Gerstenberger, R., Podstawski, M., Gianinazzi, L., Gajda, J., Lehmann, T., Niewiadomski, H., Nyczyk, P., & Hoefler, T. (2024). Graph of Thoughts: Solving Elaborate Problems with Large Language Models. *Proceedings of the AAAI Conference on Artificial Intelligence*, *38*(16), 17682–17690. https://doi.org/10.1609/aaai.v38i16.29720

Bezzina, F., Tracz-Krupa, K., Zielińska, A., & Cassar, V. (2025). Scale validation of the “Key Competences in Sustainability” Indicator Tool (KCiS-IT) among business and economics students in seven European HEIs. *International Journal of Sustainability in Higher Education*. https://doi.org/10.1108/IJSHE-09-2024-0621

Bibri, S. E., Krogstie, J., Kaboli, A., & Alahi, A. (2024). Smarter eco-cities and their leading-edge artificial intelligence of things solutions for environmental sustainability: A comprehensive systematic review. *Environmental Science and Ecotechnology*, *19*, 100330. https://doi.org/10.1016/j.ese.2023.100330

Borisov, V., Leemann, T., Seßler, K., Haug, J., Pawelczyk, M., & Kasneci, G. (2024). Deep Neural Networks and Tabular Data: A Survey. *IEEE Transactions on Neural Networks and Learning Systems*, *35*(6), 7499–7519. https://doi.org/10.1109/TNNLS.2022.3229161

Cantillo, J., Natchiyar, B., & Michelsen, O. (2025). Recognising the need for biodiversity knowledge for engineering students – a case study in Norway. *International Journal of Sustainability in Higher Education*, *26*(4), 755–772. https://doi.org/10.1108/IJSHE-01-2024-0026

Cao, H., Tan, C., Gao, Z., Xu, Y., Chen, G., Heng, P.-A., & Li, S. Z. (2024). A Survey on Generative Diffusion Models. *IEEE Transactions on Knowledge and Data Engineering*, *36*(7), 2814–2830. https://doi.org/10.1109/TKDE.2024.3361474

Carvalho, I., & Ivanov, S. (2024). ChatGPT for tourism: applications, benefits and risks. *Tourism Review*, *79*(2), 290–303. https://doi.org/10.1108/TR-02-2023-0088

Cembranel, P., Gewehr, L., Dal Moro, L., Fuchs, P. G., Birch, R. S., & Andrade Guerra, J. B. S. O. de A. (2024). The pivotal role of higher education institutions in cultivating a sustainable development goals-centric culture. *International Journal of Sustainability in Higher Education*, *25*(7), 1385–1411. https://doi.org/10.1108/IJSHE-01-2024-0057

Chen, J., Mei, J., Li, X., Lu, Y., Yu, Q., Wei, Q., Luo, X., Xie, Y., Adeli, E., Wang, Y., Lungren, M. P., Zhang, S., Xing, L., Lu, L., Yuille, A., & Zhou, Y. (2024). TransUNet: Rethinking the U-Net architecture design for medical image segmentation through the lens of transformers. *Medical Image Analysis*, *97*, 103280. https://doi.org/10.1016/j.media.2024.103280

Chen, R. J., Ding, T., Lu, M. Y., Williamson, D. F. K., Jaume, G., Song, A. H., Chen, B., Zhang, A., Shao, D., Shaban, M., Williams, M., Oldenburg, L., Weishaupt, L. L., Wang, J. J., Vaidya, A., Le, L. P., Gerber, G., Sahai, S., Williams, W., & Mahmood, F. (2024). Towards a general-purpose foundation model for computational pathology. *Nature Medicine*, *30*(3), 850–862. https://doi.org/10.1038/s41591-024-02857-3

Chiu, T. K. F. (2024). The impact of Generative AI (GenAI) on practices, policies and research direction in education: a case of ChatGPT and Midjourney. *Interactive Learning Environments*, *32*(10), 6187–6203. https://doi.org/10.1080/10494820.2023.2253861

Chiu, T. K. F., Moorhouse, B. L., Chai, C. S., & Ismailov, M. (2023). Teacher support and student motivation to learn with Artificial Intelligence (AI) based chatbot. *Interactive Learning Environments*. https://doi.org/10.1080/10494820.2023.2172044

Collins, G. S., Moons, K. G. M., Dhiman, P., Riley, R. D., Beam, A. L., Van Calster, B., Ghassemi, M., Liu, X., Reitsma, J. B., Van Smeden, M., Boulesteix, A. L., Camaradou, J. C., Celi, L. A., Denaxas, S., Denniston, A. K., Glocker, B., Golub, R. M., Harvey, H., Heinze, G., … Logullo, P. (2024). TRIPOD+AI statement: Updated guidance for reporting clinical prediction models that use regression or machine learning methods. *Bmj*. https://doi.org/10.1136/bmj-2023-078378

Cotton, D. R. E., Cotton, P. A., & Shipway, J. R. (2024). Chatting and cheating: Ensuring academic integrity in the era of ChatGPT. *Innovations in Education and Teaching International*, *61*(2), 228–239. https://doi.org/10.1080/14703297.2023.2190148

Cui, H., Wang, C., Maan, H., Pang, K., Luo, F., Duan, N., & Wang, B. (2024). scGPT: toward building a foundation model for single-cell multi-omics using generative AI. *Nature Methods*, *21*(8), 1470–1480. https://doi.org/10.1038/s41592-024-02201-0

Dalla Gasperina, L., Mazutti, J., Londero Brandli, L., & dos Santos Rabello, R. (2022). Smart practices in HEIs and the contribution to the SDGs: implementation in Brazilian university. *International Journal of Sustainability in Higher Education*, *23*(2), 356–378. https://doi.org/10.1108/IJSHE-12-2020-0480

Dwivedi, Y. K., Pandey, N., Currie, W., & Micu, A. (2024). Leveraging ChatGPT and other generative artificial intelligence (AI)-based applications in the hospitality and tourism industry: practices, challenges and research agenda. *International Journal of Contemporary Hospitality Management*, *36*(1), 1–12. https://doi.org/10.1108/IJCHM-05-2023-0686

El-kenawy, E. S. M., Khodadadi, N., Mirjalili, S., Abdelhamid, A. A., Eid, M. M., & Ibrahim, A. (2024). Greylag Goose Optimization: Nature-inspired optimization algorithm. *Expert Systems with Applications*, *238*. https://doi.org/10.1016/j.eswa.2023.122147

Engman, M. M. (2024). Relationality, Plurilingualism, and Place: Language Education in Higher Education in Northern Ireland. In *The BERA Guide to Decolonising the Curriculum: Equity and Inclusion in Educational Research and Practice* (pp. 187–195). Emerald Publishing Limited. https://doi.org/10.1108/978-1-83549-144-720241017

Farrokhnia, M., Banihashem, S. K., Noroozi, O., & Wals, A. (2024). A SWOT analysis of ChatGPT: Implications for educational practice and research. *Innovations in Education and Teaching International*, *61*(3), 460–474. https://doi.org/10.1080/14703297.2023.2195846

Ferrara, E. (2023). Fairness and Bias in Artificial Intelligence: A Brief Survey of Sources, Impacts, and Mitigation Strategies. *Sci*, *6*(1), 3. https://doi.org/10.3390/sci6010003

Feuerriegel, S., Hartmann, J., Janiesch, C., & Zschech, P. (2024). Generative AI. *Business and Information Systems Engineering*, *66*(1), 111–126. https://doi.org/10.1007/s12599-023-00834-7

Finatto, C. P., Fuchs, P. G., Aguiar Dutra, A. R., & Guerra, J. B. S. de A. (2024). Environmental, social, governance and sustainable development goals: promoting sustainability in universities. *International Journal of Sustainability in Higher Education*, *25*(6), 1121–1136. https://doi.org/10.1108/IJSHE-11-2022-0361

Finnveden, G., Friman, E., Mogren, A., Palmer, H., Sund, P., Carstedt, G., Lundberg, S., Robertsson, B., Rodhe, H., & Svärd, L. (2020). Evaluation of integration of sustainable development in higher education in Sweden. *International Journal of Sustainability in Higher Education*, *21*(4), 685–698. https://doi.org/10.1108/IJSHE-09-2019-0287

Franklin, K., Halvorson, S. J., & Brown, F. (2023). Impacts of service learning on tourism students’ sustainability competencies in conflict-affected Bamyan, Afghanistan. *International Journal of Sustainability in Higher Education*, *24*(6), 1328–1346. https://doi.org/10.1108/IJSHE-04-2022-0112

Gaete-Sepulveda, M., & Murach, A. (2025). A holistic model for student-centered on and off-campus housing – a cross-country evaluation. *International Journal of Sustainability in Higher Education*. https://doi.org/10.1108/IJSHE-07-2024-0442

Gao, P., Geng, S., Zhang, R., Ma, T., Fang, R., Zhang, Y., Li, H., & Qiao, Y. (2024). CLIP-Adapter: Better Vision-Language Models with Feature Adapters. *International Journal of Computer Vision*, *132*(2), 581–595. https://doi.org/10.1007/s11263-023-01891-x

Gill, S. S., Xu, M., Patros, P., Wu, H., Kaur, R., Kaur, K., Fuller, S., Singh, M., Arora, P., Parlikad, A. K., Stankovski, V., Abraham, A., Ghosh, S. K., Lutfiyya, H., Kanhere, S. S., Bahsoon, R., Rana, O., Dustdar, S., Sakellariou, R., … Buyya, R. (2024). Transformative effects of ChatGPT on modern education: Emerging Era of AI Chatbots. *Internet of Things and Cyber-Physical Systems*, *4*(June 2023), 19–23. https://doi.org/10.1016/j.iotcps.2023.06.002

Gi̇rgen, M. U., & Kole, A. (2024). Academic impressions pertaining to the “new normal” in tourism education and practice in accordance with digital technology and creativity. *Worldwide Hospitality and Tourism Themes*, *16*(1), 10–25. https://doi.org/10.1108/WHATT-01-2024-0015

Hansen, B., Stiling, P., & Uy, W. F. (2021). Innovations and challenges in SDG integration and reporting in higher education: a case study from the University of South Florida. *International Journal of Sustainability in Higher Education*, *22*(5), 1002–1021. https://doi.org/10.1108/IJSHE-08-2020-0310

Hermann, R. R., Bonzanini Bossle, M., Aleixo Costa, M. A., & Neutzling, D. M. (2025). Education for sustainable development goals through service learning: a university-community collaboration in northeast Brazil. *International Journal of Sustainability in Higher Education*. https://doi.org/10.1108/IJSHE-11-2024-0776

Hong, D., Zhang, B., Li, X., Li, Y., Li, C., Yao, J., Yokoya, N., Li, H., Ghamisi, P., Jia, X., Plaza, A., Gamba, P., Benediktsson, J. A., & Chanussot, J. (2024). SpectralGPT: Spectral Remote Sensing Foundation Model. *IEEE Transactions on Pattern Analysis and Machine Intelligence*, *46*(8), 5227–5244. https://doi.org/10.1109/TPAMI.2024.3362475

Leal Filho, W., Dinis, M. A. P., Sivapalan, S., Begum, H., Ng, T. F., Al-Amin, A. Q., Alam, G. M., Sharifi, A., Salvia, A. L., Kalsoom, Q., Saroar, M., & Neiva, S. (2022). Sustainability practices at higher education institutions in Asia. *International Journal of Sustainability in Higher Education*, *23*(6), 1250–1276. https://doi.org/10.1108/IJSHE-06-2021-0244

Leung, H. H., Ng, A., Rosas, J., Dikas, K., Matthews, O., & Li, M. (2025). The role of science communication in sustainability education: the case of a university community in Northern Ontario. *International Journal of Sustainability in Higher Education*. https://doi.org/10.1108/IJSHE-10-2024-0741

Li, Y., Jiang, Y., Li, Z., & Xia, S.-T. (2024). Backdoor Learning: A Survey. *IEEE Transactions on Neural Networks and Learning Systems*, *35*(1), 5–22. https://doi.org/10.1109/TNNLS.2022.3182979

Liu, G., & Ma, C. (2024). Measuring EFL learners’ use of ChatGPT in informal digital learning of English based on the technology acceptance model. *Innovation in Language Learning and Teaching*, *18*(2), 125–138. https://doi.org/10.1080/17501229.2023.2240316

Mac-lean, C., Cancino, D., Vargas, L., Radovic, D., & Vera, M. (2025). Sustainability transformation processes as a driving force to promote female participation in STEM-oriented higher education institutions: a Chilean case study. *International Journal of Sustainability in Higher Education*. https://doi.org/10.1108/IJSHE-04-2024-0276

Mennella, C., Maniscalco, U., De Pietro, G., & Esposito, M. (2024). Ethical and regulatory challenges of AI technologies in healthcare: A narrative review. *Heliyon*, *10*(4), e26297. https://doi.org/10.1016/j.heliyon.2024.e26297

Min, B., Ross, H., Sulem, E., Veyseh, A. P. Ben, Nguyen, T. H., Sainz, O., Agirre, E., Heintz, I., & Roth, D. (2024). Recent Advances in Natural Language Processing via Large Pre-trained Language Models: A Survey. *ACM Computing Surveys*, *56*(2), 1–40. https://doi.org/10.1145/3605943

Mokski, E., Leal Filho, W., Sehnem, S., & Andrade Guerra, J. B. S. O. de. (2023). Education for sustainable development in higher education institutions: an approach for effective interdisciplinarity. *International Journal of Sustainability in Higher Education*, *24*(1), 96–117. https://doi.org/10.1108/IJSHE-07-2021-0306

O’Keeffe, J. M., Simpson, E., Jorat, M. E., & Vilnay, M. (2020). *Sustainable Deployment of Environmental Management Systems for Higher Education Institutions: Challenges and Limitations*. 81–99. https://doi.org/10.1108/s2055-364120200000020010

Pan, S., Luo, L., Wang, Y., Chen, C., Wang, J., & Wu, X. (2024). Unifying Large Language Models and Knowledge Graphs: A Roadmap. *IEEE Transactions on Knowledge and Data Engineering*, *36*(7), 3580–3599. https://doi.org/10.1109/TKDE.2024.3352100

Pinto, M. de F. da R., Scavarda, A., & Machado, F. V. (2025). The integration of SDGs and biodiversity in HEIs curricula and practices: a systematic literature review. *International Journal of Sustainability in Higher Education*, *26*(4), 827–851. https://doi.org/10.1108/IJSHE-05-2024-0360

Raiaan, M. A. K., Mukta, M. S. H., Fatema, K., Fahad, N. M., Sakib, S., Mim, M. M. J., Ahmad, J., Ali, M. E., & Azam, S. (2024). A Review on Large Language Models: Architectures, Applications, Taxonomies, Open Issues and Challenges. *IEEE Access*, *12*, 26839–26874. https://doi.org/10.1109/ACCESS.2024.3365742

Rainio, O., Teuho, J., & Klén, R. (2024). Evaluation metrics and statistical tests for machine learning. *Scientific Reports*, *14*(1), 6086. https://doi.org/10.1038/s41598-024-56706-x

Saleem, A., Aslam, S., Sang, G., Dare, P. S., & Zhang, T. (2023). Education for sustainable development and sustainability consciousness: evidence from Malaysian universities. *International Journal of Sustainability in Higher Education*, *24*(1), 193–211. https://doi.org/10.1108/IJSHE-05-2021-0198

Sepasi, S., Braendle, U., & Rahdari, A. H. (2019). Comprehensive sustainability reporting in higher education institutions. *Social Responsibility Journal*, *15*(2), 155–170. https://doi.org/10.1108/SRJ-01-2018-0009

Stahl, B. C., & Eke, D. (2024). The ethics of ChatGPT – Exploring the ethical issues of an emerging technology. *International Journal of Information Management*, *74*, 102700. https://doi.org/10.1016/j.ijinfomgt.2023.102700

Strzelecki, A. (2024). To use or not to use ChatGPT in higher education? A study of students’ acceptance and use of technology. *Interactive Learning Environments*, *32*(9), 5142–5155. https://doi.org/10.1080/10494820.2023.2209881

Sun, Z., Wang, G., Li, P., Wang, H., Zhang, M., & Liang, X. (2024). An improved random forest based on the classification accuracy and correlation measurement of decision trees. *Expert Systems with Applications*, *237*, 121549. https://doi.org/10.1016/j.eswa.2023.121549

Teixeira, J. G., Gallan, A. S., & Wilson, H. N. (2024). SDG commentary: service ecosystems with the planet - weaving the environmental SDGs with human services. *Journal of Services Marketing*, *38*(2), 227–237. https://doi.org/10.1108/JSM-04-2023-0158

Varnosfaderani, S. M., & Forouzanfar, M. (2024). The Role of AI in Hospitals and Clinics : Transforming Healthcare in the 21st Century. *Bioengineering*, *11*(4), 1–38. https://doi.org/10.3390/bioengineering11040337

Vats, S., Sharma, V., Singh, K., Pratap Singh, D., Yazid Bajuri, M., Taniar, D., Innab, N., Mouldi, A., & Ahmadian, A. (2024). Iterative enhancement fusion-based cascaded model for detection and localization of multiple disease from CXR-Images. *Expert Systems with Applications*, *255*, 124464. https://doi.org/10.1016/j.eswa.2024.124464

Walter, Y. (2024). Embracing the future of Artificial Intelligence in the classroom: the relevance of AI literacy, prompt engineering, and critical thinking in modern education. *International Journal of Educational Technology in Higher Education*, *21*(1), 15. https://doi.org/10.1186/s41239-024-00448-3

Wang, L., Zhang, X., Su, H., & Zhu, J. (2024). A Comprehensive Survey of Continual Learning: Theory, Method and Application. *IEEE Transactions on Pattern Analysis and Machine Intelligence*, *46*(8), 5362–5383. https://doi.org/10.1109/TPAMI.2024.3367329

Wang, X., Wang, S., Liang, X., Zhao, D., Huang, J., Xu, X., Dai, B., & Miao, Q. (2024). Deep Reinforcement Learning: A Survey. *IEEE Transactions on Neural Networks and Learning Systems*, *35*(4), 5064–5078. https://doi.org/10.1109/TNNLS.2022.3207346

Yan, L., Sha, L., Zhao, L., Li, Y., Martinez‐Maldonado, R., Chen, G., Li, X., Jin, Y., & Gašević, D. (2024). Practical and ethical challenges of large language models in education: A systematic scoping review. *British Journal of Educational Technology*, *55*(1), 90–112. https://doi.org/10.1111/bjet.13370

Yang, J., Jin, H., Tang, R., Han, X., Feng, Q., Jiang, H., Zhong, S., Yin, B., & Hu, X. (2024). Harnessing the Power of LLMs in Practice: A Survey on ChatGPT and Beyond. *ACM Transactions on Knowledge Discovery from Data*, *18*(6), 1–32. https://doi.org/10.1145/3649506

Ye, M., Fang, X., Du, B., Yuen, P. C., & Tao, D. (2024). Heterogeneous Federated Learning: State-of-the-art and Research Challenges. *ACM Computing Surveys*, *56*(3), 1–44. https://doi.org/10.1145/3625558

Yerokhin, S.-M., Lin Feuer, Y.-S., & Sassen, R. (2025). Biodiversity preservation in German higher education institutions: existing approaches, challenges and future developments. *International Journal of Sustainability in Higher Education*, *26*(4), 717–734. https://doi.org/10.1108/IJSHE-12-2023-0608

Yılmaz Fındık, L., Bayram, İ., & Canaran, Ö. (2021). Pre-service English language teachers’ conceptions of sustainable development: a case from Turkish higher education context. *International Journal of Sustainability in Higher Education*, *22*(2), 423–456. https://doi.org/10.1108/IJSHE-06-2020-0202

Yoo, S.-S., Kim, G., La, S. J., & Sung, Y. (2024). Exploring sustainability consciousness as a psychological construct with undergraduate students in the Republic of Korea. *International Journal of Sustainability in Higher Education*, *25*(8), 1610–1625. https://doi.org/10.1108/IJSHE-06-2023-0215

Zahid, M., Ur Rahman, H., Ali, W., Habib, M. N., & Shad, F. (2021). Integration, implementation and reporting outlooks of sustainability in higher education institutions (HEIs): index and case base validation. *International Journal of Sustainability in Higher Education*, *22*(1), 120–137. https://doi.org/10.1108/IJSHE-10-2019-0308

Zhang, P., Zhang, D., Zhou, W., Wang, L., Wang, B., Zhang, T., & Li, S. (2023). Network pharmacology: towards the artificial intelligence-based precision traditional Chinese medicine. *Briefings in Bioinformatics*, *25*(1). https://doi.org/10.1093/bib/bbad518

Zhao, X., Wang, L., Zhang, Y., Han, X., Deveci, M., & Parmar, M. (2024). A review of convolutional neural networks in computer vision. *Artificial Intelligence Review*, *57*(4), 99. https://doi.org/10.1007/s10462-024-10721-6

Zhong, F., Ma, X., Jiang, X., Mao, Y., & Lyu, X. (2024). Sustainable development education’s pathways and influencing factors for enhancing sustainability behaviors: a survey of Chinese university students. *International Journal of Sustainability in Higher Education*. https://doi.org/10.1108/IJSHE-03-2024-0213
